1 **Environmentally dependent and independent control of cell shape determination**  
2 **by Rho GTPase regulators in melanoma**

3 L. G. Dent <sup>2¶</sup>, N. Curry <sup>1¶</sup>, H. Sparks <sup>1&</sup>, V. Bousgouni <sup>2&</sup>, V. Maioli <sup>1</sup>, S. Kumar <sup>1</sup>, I. Munro <sup>1</sup>, C.  
4 Dunsby <sup>1,3 &&\*</sup>, C. Bakal <sup>2 &&\*</sup>

5

6 <sup>1</sup> Photonics Group, Department of Physics, Imperial College London, London, SW7 2AZ, UK

7 <sup>2</sup> Division of Cancer Biology, Institute of Cancer Research, 237 Fulham Road, London SW3

8 6JB, UK

9 <sup>3</sup> Centre for Pathology, Imperial College London, London, SW7 2AZ, UK

10

11 ¶ These authors contributed equally to this work

12 & These authors also contributed equally to this work

13 && These authors also contributed equally to this work

14 \* Corresponding author

15 E-mail: [chris.bakal@icr.ac.uk](mailto:chris.bakal@icr.ac.uk) (CB), [christopher.dunsby@imperial.ac.uk](mailto:christopher.dunsby@imperial.ac.uk) (CD)

16 Running Head: '3D shape control by Rho-regulators'

## 17 **Abstract**

18 In order to invade 3D tissues, cancer cells dynamically change cell morphology in response to  
19 geometric and mechanical cues in the environment. But how cells determine their shape in 3D  
20 versus 2D environments is poorly understood. Studying 2D versus 3D single cell shape  
21 determination has historically been technically difficult due to the lack of methodologies to directly  
22 compare the two environments. We developed an approach to study cell shape in 2D versus 3D  
23 by measuring cell shape at different depths in collagen using stage-scanning oblique plane  
24 microscopy (ssOPM). We find characteristic shape changes occur in melanoma cells depending  
25 on whether a cell is attached to a 2D surface or 3D environment, and that these changes can be  
26 modulated by Rho GTPase regulatory proteins. Our data suggest that regulation of cell  
27 protrusivity undergoes a ‘switch’ of control between different Rho GTPase regulators depending  
28 on the physical microenvironment.

29

## 30 **Abbreviations**

31 LSM: light sheet fluorescence microscopy, OPM: oblique plane microscopy, PSF: point spread  
32 function, ssOPM: stage scanning oblique plane microscopy

## 33 Introduction

34 The ability of metastatic cancer cells to invade three-dimensional (3D) structures such as tissues  
35 and organs is dependent on their ability to change shape in response to the environment. To  
36 respond to the environment, cells detect factors such as stiffness and geometry and in turn  
37 dynamically regulate their cytoskeleton [1–6]. Cells appear to convert between two major modes  
38 of migration and shape control: (i) adhesion based mesenchymal migration, (ii) cortical tension  
39 based amoeboid and lobopodial migration [7–11].

40 On rigid 2D substrates such as glass (modulus of elasticity 60-64 GPa) [12], melanoma cells  
41 typically adopt an elongated 'spindle' or mesenchymal shape. In contrast, on softer environments  
42 such as collagen hydrogels, cells can adopt either mesenchymal or amoeboid shapes depending  
43 on environmental parameters such as stiffness and pore size [13]. The modulus of elasticity for  
44 different compositions of collagen hydrogel is a major determinant of cell shape and typically  
45 ranges between 50 and 5000 Pascals [14–19]. In stiff 3D collagen environments with small pore  
46 sizes that restrict migration, cells adopt mesenchymal modes of migration. Within soft or more  
47 porous 3D substrates cells tend to adopt 'amoeboid' and 'lobopodial' forms. Amoeboid cell  
48 migration is characterized by extensive contraction of cortical actomyosin and weaker adhesion  
49 to the substrate [20–22]. Amoeboid cells invade 3D matrices by pushing via 'blebs', which are  
50 protrusions in the plasma membrane generated by hydrostatic pressure. The ability of cells to  
51 switch between spindle and amoeboid forms provides cancer cells with the ability to invade  
52 substrates with different stiffness and geometry [7,23].

53 Many of the changes in cell shape between environments of different stiffness and geometry are  
54 controlled by Rho GTPase proteins. For example, activation of RHOA is associated with  
55 increased myosin II-mediated contractility and cell rounding. In contrast, activation of CDC42  
56 leads to WASP and arp2/3 activity and the formation of protrusions, whereas RAC1 activation

57 leads to increased WAVE activity and the formation of protrusions in 3D spindle cells, or  
58 lamellipodia in 2D cells [24,25].

59 Although Rho GTPases are important determinants of cell shape, additional layers of regulation  
60 are necessary for GTPases to be able to ‘detect’ differences in the environment and respond with  
61 dynamic changes in activity. This fine-tuned regulation comes from Rho GTP exchange factors  
62 (RhoGEFs) and Rho GTPase activating proteins (RhoGAPs) [26]. RhoGEFs increase the activity  
63 of GTPases by promoting the release of GDP and loading of GTP. RhoGAPs (Rho GTPase  
64 activating proteins) decrease the activity of GTPases by catalysing hydrolysis of GTP to GDP  
65 [27]. Previously, RhoGEFs and RhoGAPs have been shown to be able to confer environmental  
66 responsiveness to Rho GTPases through recruitment and activation at distinct subcellular  
67 locations. For example, ARHGEF7 and SRGAP1 play important roles in regulating cell shape in  
68 3D collagen versus fibronectin gels [28]. Differential activation of RhoGEFs and RhoGAPs likely  
69 underpin the ability of metastatic cells to change shape as cells transition between different  
70 environments such as tumor and normal tissue. Despite this, in many instances the  
71 RhoGEFs/GAPs that allow cancer cells to respond to a particular environmental context, remain  
72 to be identified.

73 Identifying the RhoGEFs, RhoGAPS that control different aspects of cell shape and migration in  
74 response to the environment is a major goal of biology, but there are significant challenges. For  
75 example, although disruption of the classical Rho GTPases such as RHO, RAC and CDC42 each  
76 have profound and stereotypic consequences for cell shape, the effect of RhoGEFs/GAPs can be  
77 more subtle and varied. In contrast to the ~20 mammalian Rho GTPases [29], there are some  
78 145 Rho-regulatory GEFs and GAPs and their disruption often results in context specific  
79 modulation of shape.

80 A challenge in understanding the differences in shape control between 2D versus 3D  
81 environments is the difficulty of imaging the same cell populations in distinct environments  
82 simultaneously. In part this can be accomplished by culturing cells in invasion assays where cells  
83 migrate 'up' from a 2D environment into 3D collagen hydrogels [11]. However, conventional  
84 microscopy is poorly suited to imaging cells in both 2D and 3D environments, and is not  
85 appropriate for measuring 3D geometry.

86 3D imaging of cells at multiple depths can be achieved at high speed using light-sheet  
87 fluorescence microscopy (LSFM). Here we used stage-scanning oblique plane microscopy  
88 (ssOPM) for imaging melanoma cells invading a collagen hydrogel. ssOPM has been previously  
89 applied to time-lapse imaging of spheroids in multi-well plates [30]. This technique is based on  
90 oblique plane microscopy (OPM) where the same high NA objective delivers the light sheet and  
91 collects the fluorescence [31]. This system is built around a standard microscope frame and uses  
92 standard multiwell plates. We retain the advantages of working with a standard microscope frame  
93 but gain fast 3D imaging. The ssOPM images large volumes ( $4.2 \times 0.32 \times 0.144 \text{ mm}^3$ ) corresponding  
94 to 100s of cells in 108 s. The collection NA is 0.7 and the system provides a spatial resolution of  
95  $0.5 \times 0.5 \times 5 \text{ }\mu\text{m}^3$  [32]. This allows the 3D position and shape of large numbers of cells to be  
96 measured.

97 We analysed cell shape in control treated cells, and in response to depletion of different Rho-  
98 regulatory proteins. We found characteristic shape changes as cells transition from a 2D to 3D  
99 environment, and that these changes can be modulated by depletion of Rho-regulators. We also  
100 found that some Rho-regulators influence cell shape in a range of physical settings, while others  
101 are more context specific. In particular, focusing on cell protrusivity we found that depletion of  
102 Rho-regulators such as *TIAM2* changed protrusivity in both 2D and 3D environments, whereas  
103 depletion of *FARP1* only modulated protrusivity in 2D environments. This data suggests that cells  
104 can adjust shape control between different Rho-regulators depending on their local environment.

105 Taken together, these results reveal new context specific regulators of protrusivity and highlight  
106 the ability of high-throughput plate based volumetric imaging to rapidly assay and identify proteins  
107 in control of cell shape.

108

## 109 **Methods**

### 110 **Cell culture**

111 WM266.4 melanoma cells expressing CAAX-GFP (donated by the Marshall lab) were grown in  
112 Dulbecco's Modified Eagle Medium (DMEM) supplemented with 10% heat-inactivated bovine  
113 serum (FBS) and 1% penicillin/streptomycin in T75 flasks. Cells were cultured at 37°C and  
114 supplemented with 5% CO<sub>2</sub> in humidified incubators.

### 115 **Cell treatments and preparation**

116 WM266.4 melanoma cells expressing CAAX-GFP were reverse transfected with OnTARGETplus  
117 SMARTpool (Table 1). Gene name and Dharmacon catalogue numbers were as follows:  
118 *ARHGEF35*, *ARHGEF9*, *PREX2*, *FARP1*, *TIAM2*, *SRGAP1*, *DOCK5*, *RND3* and *ECT2*  
119 (Dharmacon cat # L-032365-02-0005, # L-020314-00-0005, # L-014602-00-0005, # L-008519-  
120 00-0005, # L-008434-00-0005, # L-026974-00-0005, # L-018931-00-0005, # L-007794-00-0005  
121 and # L-006450-00-0005) at stock concentration 20 µM in 6 well plates. Transfections were  
122 carried out using Lipofectamine RNAimax (Invitrogen) according to the manufacturer's  
123 instructions. On the second day after transfection, 10<sup>5</sup> cells/ml were re-suspended in 500 µl of 2.3  
124 mg/ml collagen rat tail (Gibco). A 100 µl volume of the collagen and cell mixture was dispensed  
125 in quadruplicate wells onto poly-D-Lysine (0.1mg/ml) coated glass bottom view 96 well plates  
126 (PerkinElmer). Plates were centrifuged @1200 rpm for 5 minutes at 4°C and incubated overnight

127 in a tissue culture incubator. After incubation, cells were fixed with 4% PFA methanol free for 30  
128 mins at RT. Wells were stained with DRAQ5 at a concentration of 5  $\mu$ M, to label nuclei.

129 **Table 1. Gene names and siRNA reagent details for this study**

| HGNC nomenclature | Reagent ID       |
|-------------------|------------------|
| ARHGEF35          | L-032365-02-0005 |
| ARHGEF9           | L-020314-00-0005 |
| PREX2             | L-014602-00-0005 |
| FARP1             | L-008519-00-0005 |
| TIAM2             | L-008434-00-0005 |
| SRGAP1            | L-026974-00-0005 |
| DOCK5             | L-018931-00-0005 |
| RND3              | L-007794-00-0005 |

|      |                  |
|------|------------------|
| ECT2 | L-006450-00-0005 |
|------|------------------|

130

## 131 Microscopy setup

132 Oblique plane microscopy was performed using a setup reported previously [30] and a schematic  
133 is shown (Supplementary Fig 1A). Five excitation sources at different wavelengths (457, 488, 515,  
134 561, 642 nm) are combined onto a common optical path using dichroic mirrors. An acousto-optic  
135 tunable filter – allowing switching and power control – is used to selectively couple the beams into  
136 a single-mode polarisation-maintaining fibre.

137 Light exiting the fibre is collimated (L1) then focused in the horizontal direction by a cylindrical  
138 lens (C1) onto the back focal plane of spherical lens L2. This results in a vertically orientated light  
139 sheet at 55 degrees to the optical axis of O2. The microscope formed by O2 and TL2 relays the  
140 light sheet to the image plane of the camera port of a commercially available microscope frame  
141 (Olympus IX71). The commercial microscope (comprising TL1 and O1) relays the light sheet to  
142 the image plane of O1. O1 is a 60X/1.2NA water immersion objective (Olympus UPLSAPO60XW).  
143 The microscope objective was fitted with a collar to provide a continuous supply of water  
144 immersion liquid.

145 The overall magnification between the image planes of O1 and O2 is set to be equal to the ratio  
146 of the refractive indices for the images formed at O1 (water) and O2 (air) to ensure that the lateral  
147 and axial magnification between the focal planes of O1 and O2 are equal [33]. The excitation light  
148 sheet produced across the focal plane of O1 excites fluorescence from the sample. The resulting  
149 fluorescence image is relayed back to the focal plane of O2. O3 is positioned at 35 degrees to  
150 the optical axes of O1 and O2, such that the fluorescence image of the region illuminated by the



151 light sheet in the sample is perpendicular to its optical axis, and conjugate with the focal plane of  
152 O3. Together with tube lenses TL3a and TL3b, this system relays an image of the fluorescence  
153 emitted within the light sheet to the two sCMOS cameras. A dichroic beam splitter (DC) and  
154 emission filters (EM1, EM2) separate emitted fluorescence for two-colour imaging.

155

## 156 Image acquisition

157 Stage-scanning OPM was implemented as described previously [34]. A motorised stage (SCAN-  
158 IM 120 × 80, Marzhäuser) controlled by a driver unit (Tango 2 fitted with AUX I/O option,  
159 Marzhäuser) outputs a TTL trigger each time it has travelled a predefined distance (1.4 μm for  
160 the results presented here). The TTL output is connected to a digital acquisition box (DAQ)  
161 (National Instruments NI USB-6229) configured to output a pattern of signals each time a TTL  
162 signal is received from the x-y stage. The signals control the laser power and illumination duration,  
163 and trigger the start of camera exposures. The stage scans in the y direction, as shown  
164 (Supplementary Fig 1A). During acquisition a scan speed of 0.1 μm ms<sup>-1</sup> was used. A speed of  
165 10 μm ms<sup>-1</sup> was used to move between wells.

166 The two sCMOS cameras (PCO.edge, PCO) were both operated in Global Reset acquisition  
167 mode with 1280x1000 pixels. The exposure time was defined by the 2 ms laser exposure time.  
168 The two spectral channels were interleaved temporally to prevent cross-talk between channels.  
169 Per field of view, the x-y stage was scanned 4200 μm in the y direction (corresponding to 3000  
170 frames per camera). Each field of view corresponded to 7.32 GB of data per channel and took 42  
171 s to acquire. Image acquisition was controlled by a HP z840 PC with 128 GB of RAM and a 4x1  
172 TB SSD configured in RAID 0. Saving and moving to the next well took a further 66 s (for a total  
173 of 108 seconds per well).

174 Volumetric imaging in 3 spectral channels (2 x fluorescence and 1 x scatter) was performed in  
175 two stages. The first stage acquired the two fluorescence spectral channels (CAAX-GFP and  
176 DRAQ5) for the entire plate. In the second stage, the image acquisition was repeated but now  
177 with scattered light from collagen imaged on camera 1 with 488 nm excitation and in the absence  
178 of an emission filter. Camera 2 was used to image the DRAQ5 channel for a second time. As  
179 images of DRAQ5 were acquired in both stages, they could then be used to measure any drift  
180 between image sets and thus enable the two sets to be co-registered.

181

## 182 Image reslicing and registration

183 The average background level was measured for each camera by taking the average pixel value  
184 over a field of view acquired with no laser on. This was subtracted from the data prior to reslicing.

185 The 2D transform to co-register camera 1 and camera 2 was measured based on a 2-channel  
186 fluorescence image acquisition of a sample of 100 nm four-colour fluorescent beads (TetraSpeck,  
187 Thermofisher) in 10% agarose. The x-y shift, magnification and rotation needed to co-register the  
188 data acquired on camera 2 to that of camera 1 was measured manually using a custom script in  
189 MATLAB (imtranslate, imrotate, imscale and fliplr: Image Processing Toolbox, MATLAB). This  
190 transform was applied to all raw image data acquired on camera 2 prior to reslicing.

191 Raw ssOPM images are a set of image planes at 55 degrees to the optical axis of O1. The data  
192 was transformed into conventional coordinates (z parallel to the optical axis, x&y&z  
193 perpendicular). Reslicing was performed using a bi-linear resampling algorithm [35]. To increase  
194 speed, a custom-written Java implementation of the algorithm was used. For all image  
195 segmentation and cell shape analysis, raw camera images were binned by factor of 4 - prior to  
196 reslicing - to reduce data volume and analysis times. Images presented in figures in this paper

197 were resliced with factor 2 binning. After reslicing voxel sizes were  $1 \times 1 \times 1 \mu\text{m}^3$  (for analysis) and  
198  $0.5 \times 0.5 \times 0.5 \mu\text{m}^3$  (for display).

199 The collagen channel was coregistered in 3D with the fluorescence channels using the `imregtform`  
200 (Image Processing Toolbox, MATLAB) using the default optimizer parameters. The transform was  
201 measured on the DRAQ5 channel, which was common to both acquisitions, and applied to the  
202 collagen channel using the `imwarp` function in MATLAB.

203

## 204 3D rendering

205 3D renders are displayed as a 3D projection with trilinear interpolation using the Volume Viewer  
206 2.01 Fiji plugin [36]. 3D surface renders were generated using the 3D viewer in Fiji.

207

## 208 Image segmentation

209 Prior to segmentation, the collagen channel was viewed manually. Any volumes where the  
210 collagen was not present throughout the entire volume were rejected from analysis. Example  
211 (accepted) volumes are shown (Supplementary Fig 3A).

212 To verify the robustness of the 3D segmentation used in this paper, two methods were tested. An  
213 intensity-threshold-based approach using an Otsu threshold and an active contour method, which  
214 uses energy minimisation (Supplementary Fig 4A). Both methods generate a mask with minimal  
215 user input so can be applied to large datasets. For both methods, cells and nuclei were segmented  
216 in 3D.

217 Prior to segmentation, the tips of the parallelepiped-shaped volume imaged by the ssOPM image  
218 acquisition were removed by cropping in the y direction. This removed any parts of the volume  
219 which were not imaged over its full axial extent due to the light-sheet angle.

220 In the intensity-based method, thresholds were measured automatically for each field of view. The  
221 nucleus threshold was selected using Otsu's method with a single level (multithresh, Image  
222 Processing Toolbox, MATLAB). The cell body was masked using a similar method. In this case  
223 there were 3 intensity levels in the image, background, brightly fluorescent cell membrane and  
224 dim fluorescent protrusions. To include all parts of the cell in the final mask, the lowest threshold  
225 found by a two-level Otsu method was used.

226 In the active contour method, an initial guess of the mask was generated using a threshold of 5  
227 digital numbers (just above the background). The final mask was formed after 500 iterations  
228 (nuclei) or 1000 iterations (cell) of the active contour method (Image Processing Toolbox,  
229 MATLAB).

230 The final nucleus mask was generated for both methods by separating touching nuclei. To  
231 achieve this, the Euclidean distance transform (bwdist, Image Processing Toolbox, MATLAB) was  
232 used on the inverse of the mask to determine the distance of each voxel to the edge of the 3D  
233 mask. A watershed (Image Processing Toolbox, MATLAB) was used on the negative of the  
234 distance transformed image to separate nuclei based on regions where the mask narrows. Nuclei  
235 with volume less than  $250 \mu\text{m}^3$  were rejected at this stage.

236 As the nuclei are part of the cell, an OR operation is applied to the cell mask and the nucleus  
237 mask to generate a combined mask. Any connected components in the cell binary mask which  
238 do not contain a nucleus were rejected. Touching cells are separated using a marker-based  
239 watershed approach. Nuclei are set as the low points (digital value 0), the cell body (digital value  
240 1) as intermediate points and the background as high points (digital value infinity). The watershed

241 finds the halfway point between touching nuclei. The watershed then underwent an AND  
242 operation with the original cell mask to generate a final mask. Following segmentation, cells  
243 touching the edges of the image volume are removed. Cells with volume below  $512 \mu\text{m}^3$  were  
244 rejected. Nuclei of rejected cells were removed from the nucleus mask.

245

## 246 Image measures

247 Cell and nucleus shape measures were read out using the regionprops3 (Image Processing  
248 Toolbox, MATLAB). Further statistics were derived from the outputs of this function as described  
249 in Supplementary Fig 2A.

250

## 251 Data processing

### 252 **Outlier removal**

253 Imaging of 3 plates produced a segmented dataset of more than  $3 \times 10^4$  cells. We aimed to remove  
254 cells and nuclei that could not be segmented accurately due to low expression of the CAAX-GFP  
255 transgene, as well as cells with surface areas that are conspicuously large due to under-  
256 segmentation. To remove cells that were improperly segmented due to low expression of the  
257 CAAX-GFP construct, we removed cells that had both: (i) low CAAX-GFP intensity (an average  
258 intensity of less than 1000 in camera digital numbers); and (ii) a nuclear to total cell volume ratio  
259 of greater than 0.95. These cells were removed from subsequent analysis as they represent nuclei  
260 with cells that cannot be appropriately measured due to low CAAX-GFP transgene expression.  
261 Applying these criteria removed approximately 500 cells (~ 1.8 % of original total).

262

## 263 **Coverslip localisation**

264 The position of the coverslip was estimated using the fluorescence in the nucleus channel. To  
265 account for spatial variations in the axial position of the coverslip over the field of view, the nucleus  
266 channel was divided into 16 segments in the y direction and the average signal in each x-y plane  
267 was found for each z position in each segment. For each segment, the coverslip location was  
268 defined as the point when the signal first reaches 45% of its maximum value when moving in the  
269 positive z direction. A full 2D map of coverslip height was then produced from the 16  
270 measurements using bilinear interpolation, giving a smooth change of coverslip height across the  
271 field of view. This map of coverslip height reflects the spatial variation across the field of view.  
272 However, this is a relatively crude method and does not account for variations in nuclear intensity  
273 between knockdowns and between plates, therefore there is a remaining global offset in coverslip  
274 position for each well that is accounted for in the next step.

275

## 276 **Nucleus height determination**

277 Following coverslip position estimation, we calculated the lower boundary of the mask for each  
278 nucleus above the coverslip (the bottom of the nucleus). To remove the remaining global offset in  
279 coverslip position, we found the nucleus with the lowest calculated height in each well and  
280 subtracted this value from the height of every cell in that well so that the lowest cell in each well  
281 had a height of zero. Finally, we corrected for wells where microscopic detachment of collagen  
282 (less than 6 microns) from the well bottom had occurred after fixation but before imaging. These  
283 wells were identifiable by discontinuities in nuclear height distributions between cells at a lowest  
284 position (attached to coverslip) and a larger number of cells in the lowest extent of the collagen  
285 gel. In these cases the lowest positioned cell in the collagen was also registered to the height of  
286 the coverslip. The median position adjustment was 1.17 micrometers.

287

## 288 **Feature reduction and feature normalisation**

289 We originally computed more than 20 measurements of cell and nuclear shape features, and  
290 subsequently reduced this set to a set of four features. We used clustering to remove the most  
291 highly correlated features as follows. First, we used single cell data to calculate Pearson  
292 correlation values between each feature using the 'cor()' function in R. Pearson correlation values  
293 between features were hierarchically clustered using the hclust() function in R, and the 'complete'  
294 linkage method (see Fig 2). The resulting cluster was partitioned into four groups, and a single  
295 cell or nuclear feature was chosen as a representative feature for each group. To allow for  
296 comparison between plates that were prepared and imaged on different days, we normalised  
297 single cell measurements for cell and nuclear features within each plate. We performed  
298 normalisation by dividing feature measurements for a single cell, by the plate median across all  
299 conditions for cells in that feature.

300

## 301 **Data analysis**

302 As some of the cell and nuclear shape features we examined did not have a normal distribution,  
303 we used non-parametric tests throughout this study. To test for differences in measures of central  
304 tendency between two conditions we used a paired Wilcoxon test with BH adjustment. For tests  
305 of difference in central tendency between more than two conditions we used a Kruskal-Wallis test,  
306 followed by a Dunn's test to discern which conditions differed from control. Tests for differences  
307 between groups were performed on summary statistics calculated for wells, with multiple wells  
308 from three different plates in each test. Tests at the well level used at least 12 wells per treatment,  
309 from three plates, with at least 50 cells in the dataset per condition. Statistical tests were

310 performed with functions in the R programming language and environment. Principal component  
311 analysis was performed on cell measurements aggregated at the well level, using the 'prcomp()'  
312 function in R.

313

314 Confirmation that shape changes between environments are  
315 robust to segmentation method and light sheet PSF shape

### 316 **Segmentation method**

317 There has been an acceleration in recent years in the development of fast 3D microscopy  
318 techniques for imaging isolated cells. However there is limited software for segmentation of full  
319 3D volumes. We test two methods for unsupervised segmentation of a full 3D dataset of cells.  
320 We tested, on control cells, a method which segments based on an Otsu threshold set for each  
321 field of view and an active contour method (both segmentation modes are described in detail in  
322 the Methods section). Supplementary Fig 4A shows the features measured using both  
323 segmentation methods. They are separated into coverslip proximal and distal groups based upon  
324 nucleus position with respect to the coverslip (as outlined in the previous section). For most of the  
325 features the Otsu and active contours methods give similar values. Changes between coverslip  
326 proximal and distal cells appeared consistent between threshold and active contour based  
327 segmentation. Overall this suggests that results are repeatable between segmentation methods.  
328 As either segmentation method is viable for this dataset, the Otsu threshold approach was chosen  
329 due to the shorter computation time.

330



### 331 **Anisotropic PSF shape**

332 In light-sheet microscopy, the point spread function (PSF) is usually not spherical. The FWHM  
333 spatial resolution of this ssOPM system has been previously reported as 0.5  $\mu\text{m}$  in the plane of  
334 the light sheet, with a light sheet thickness of 3.8  $\mu\text{m}$  at the waist. The light thickness increases  
335 to 5.4  $\mu\text{m}$  over a distance of 50  $\mu\text{m}$  from the centre of the field of view [37]. We set out to establish  
336 whether the anisotropic PSF might affect coverslip proximal cells - that are more likely to be flatter  
337 - differently to coverslip distal cells. We therefore eroded the cell and nucleus masks from all  
338 segmented data by an object approximating a worst-case PSF. This was performed using  
339 MATLAB's `imerode` function with a morphological structuring element consisting of a 1x1x5 pixel  
340 kernel angled at 45° to the coverslip plane (closest possible approximation to a 55° light sheet  
341 angle) . The voxel size in the image data was 1  $\mu\text{m}^3$ , so this corresponds to a 1x1x5  $\mu\text{m}^3$  PSF.

342 Supplementary Fig 4B shows pair plots of cell features for the thresholded mask (normal) and the  
343 eroded (`imerode`) version. Coverslip proximal and distal cells have similar normalised distributions  
344 for normal and eroded masks. This suggests that, for the selected features, the anisotropy of the  
345 mask has limited impact on the comparison between coverslip proximal and distal cells.

346

### 347 **Spatially varying light-sheet thickness**

348 The ssOPM microscope uses an illumination light sheet with a confocal parameter of 100  $\mu\text{m}$ .  
349 Therefore, the thickness of the light sheet varies as a function of the z range and is thinner at the  
350 centre of the z-range than the edges. Coverslip distal cells tend to be closer to the centre of the z  
351 range than coverslip proximal cells. Therefore cells on the coverslip experience a different PSF,  
352 which may affect the features measured.

353 To quantify this effect a reference sample of cells plated on the coverslip (no collagen) was used  
354 (referred to as the test plate). The same cells were imaged at three different z positions  
355 corresponding to the top, middle and bottom of the axial range. Example images are shown in  
356 supplementary Fig 5B. Cells from the test plate and collagen assay were grouped into bins  
357 (bottom, middle and top) based on their z coordinate (0-48, 48-96, 96-144  $\mu\text{m}$ ). Values were then  
358 normalised to the mean value for that feature in the lowest (first) bin.

359 Supplementary Fig 5A shows side by side plots of the features from the test plate and control  
360 cells from the collagen plates. Feature values were normalised by dividing by the average value  
361 in the bottom bin. On the test plate, cell surface area and the angle between cell and nucleus are  
362 both within one standard deviation of one at all heights, suggesting they are not significantly  
363 changed by the spatially varying PSF. Cell protrusivity increases in the middle bin of the test plate  
364 but a decrease in protrusivity is observed in the same bin on the collagen plate. This suggests  
365 that the decrease in protrusivity observed in coverslip distal cells is due to the change in physical  
366 environment and not due to the light sheet thickness. Nucleus minor axis shows a decrease below  
367 1 in both the middle and top bins, however this decrease is not seen in the collagen plate. Cell  
368 and nucleus volume were also tested for the test plate, but this metric was found to be affected  
369 by the spatially varying light sheet thickness. This is expected for the thin flat cells used in the test  
370 plate, which represent a deliberate worst case, as these cells are generally thinner than the light-  
371 sheet thickness. The cell volume metric was therefore not used in the analysis in this paper. We  
372 concluded that the behaviours of 'cell surface area', 'angle between', 'protrusivity' and 'nucleus  
373 minor axis' in the collagen plate are not explainable by the PSF shape alone and are dominated  
374 by other factors.

375

## 376 **Results**

### 377 **An experimental paradigm to measure cell shape in distinct** 378 **physical environments**

379 To study the differences in shape as cells transition between two mechanically and geometrically  
380 distinct environments, we suspended cells in 2 mg/ml (initial concentration) type 1 collagen (rat  
381 tail), seeded this mixture into glass-bottomed 96 well plates, and centrifuged them. We incubated  
382 cells for 24 hours before fixation. Glass is a rigid or 'hard' substrate (on the order of 1 GPa),  
383 whereas collagen at a concentration of 2 mg/ml is relatively elastic [15] (between 300 and 1600  
384 Pascals) [38–42] (Fig 1A). We used this system to study control treated cells, and also cells  
385 treated with siRNA targeting a variety of Rho-regulators that we had selected from preliminary  
386 screening (Fig 1B). To compare cell response between physical environments we used stage  
387 scanning oblique plane microscopy (ssOPM) to image the geometry of cells with nuclei at different  
388 distances from the glass coverslip (Fig 1C-E). In each single volume, approximately 200 cells  
389 were imaged across a 144  $\mu\text{m}$  z range. Using this imaging approach for all of the wells and  
390 treatments in our study generated an initial dataset containing more than 30,000 individual cells.  
391 A technical advantage of this system is that variables are internally controlled because  
392 comparisons can be made between 2D and 3D microenvironments for a large number of cells in  
393 the very same well of a 96 well plate. In the case of a single gene knockdown, protein depletion,  
394 media conditions, collagen concentration and biological composition between 'proximal  
395 embedded' and 'distal embedded' cells are shared between 2D and 3D cell microenvironments.  
396 To quantify cell morphology, we imaged GFP signal in CAAX-GFP-expressing WM266.4 cells,  
397 and visualized nuclei using DRAQ5 (Methods). Initially we generated over 20 measures of cell or  
398 nuclear shape features (Supplementary Fig 2A). We performed dimensionality reduction by using

399 hierarchical clustering to group these measurements into four clusters of highly correlated shape  
400 features (Fig 2A). A representative shape feature was selected from each cluster to be used  
401 throughout our analysis. By considering the shape features in each cluster we were also able to  
402 suggest an interpretation of the underlying biology that is tracked by each feature (Fig 2A). The  
403 shape features chosen were 'Cell surface area', 'Angle between cell and nucleus', 'Nucleus minor  
404 axis', and 'Cell protrusivity' (description of features in Supplementary Fig 2A). After feature  
405 reduction, no features had an absolute correlation of greater than 0.5 (Fig 2A). Collectively we  
406 refer to these shape features as global geometry features.

407

## 408 Human melanoma cells adopt different shapes in distinct 409 microenvironments

410 To understand how cell shapes change based on distance from the glass coverslip we first  
411 examined untreated WM266.4 melanoma cells. The data analysed included more than 2,500  
412 untreated melanoma cells in 12 wells across three plates. Based on cell shape measurements in  
413 our dataset, and on previous studies of hydrogels plated on stiff substrates we classified cells as  
414 'proximal' to the coverslip when the base of the nucleus was less than 7 microns, and 'distal' if  
415 the base of the nucleus was greater than 7 microns from the coverslip. To search for changes in  
416 shape we compared global geometry features of proximal and distal cells (Fig 2B). This revealed  
417 significant stereotypic differences in cell morphology depending on whether cell nuclei were  
418 proximal or distal to the coverslip. These changes included reduced cell protrusivity, and smaller  
419 cell surface area in distal versus proximal cells (Fig 2B). In contrast to these cell shape features,  
420 the nuclear geometry feature, length of the minor axis of the nucleus was not different between  
421 proximal and distal cells (Fig 2B). Thus cells invading 3D collagen gels are typically less protrusive  
422 and have a smaller surface area than in 2D environments.

423 Although our nuclear shape measures were not altered, we found changes in the relationship of  
424 the cell to the nucleus. When cells were proximal to the coverslip the major axis of elongation of  
425 the cell and nucleus was coordinated or 'coupled'. In contrast, for cells positioned away from the  
426 glass coverslip we found an increase in the angle between the cell and nucleus. This suggests  
427 the orientation of the nucleus was less constrained by cell geometry when positioned away from  
428 the glass coverslip.

429 Previous studies have noted that WM266.4 cells exhibit extensive heterogeneity in morphology  
430 when cultured either on stiff 2D plastic, or soft collagen matrices - adopting either amoeboid or  
431 spindle forms [8,43,44]. But how the extent of this variability changes between 2D and 3D is poorly  
432 understood. We tested whether variance in a range of shape features is changed between  
433 proximal and distal settings. Due to the connection between cell protrusivity and metastatic  
434 potential, we focused on variation in protrusivity (Fig 2E). To visualise these variations we grouped  
435 the cells into three groups - below average, near average and above average protrusivity - and  
436 selected 9 representative masks from the cell masks (Fig 2D). We also made a visual summary  
437 of variation in protrusivity (without grouping the cells) by creating 'stacked maximum intensity  
438 projections' (stacked-MIPs) (Fig 2F). The projected cells were the first 'n' cells in our dataset,  
439 which matched the protrusivity criteria. These stacked-MIPs support the finding that protrusivity  
440 is decreased when cells are positioned away from the coverslip. These observations are  
441 consistent with those made by ourselves and others that WM266.4 cells alternate between round  
442 and spindle forms in 3D gels, but are more homogenous on 2D stiff surfaces [7,8,44]. This  
443 increased variance may reflect that there are more degrees of freedom away from the rigid  
444 coverslip, which may make it less likely for cells to adopt stereotypic shapes.

445

## 446 Rho-regulators disrupt differences in shape between proximal and 447 distal cells

448 Having identified characteristic shape differences between cells that are proximal or distal to the  
449 coverslip, we interrogated the molecular control of these shape changes. To do this we depleted  
450 a range of Rho-regulatory proteins, and examined whether their function was affected by distance  
451 from the coverslip. To select a set of Rho-regulators for study by ssOPM, we had conducted a  
452 collection of preliminary screens on cells plated on collagen to look for genes that control cell  
453 morphology and imaged by confocal microscopy (Fig 1B). We identified nine Rho-regulators that  
454 have a potent influence on cell shape (Fig 1B).

455 We depleted these nine Rho-regulators and for eight of these we measured the effect on shape  
456 transitions between 'proximal' and 'distal' cells (Fig 1E and 3A and 3B). *ECT2* depleted cells  
457 frequently had a multinucleate phenotype consistent with failed cytokinesis (Fig 1E). This  
458 phenotype indicated potent protein depletion from our treatments, however to focus on primary  
459 effects of gene knockdown on shape we did not analyse these cells. To see how Rho-regulators  
460 contribute to cell shape in proximal 2D and distal 3D cells, we projected our four global geometry  
461 features (Fig 3A) in principal component (PC) space (Fig 3B). The two largest contributions to  
462 PC1 were cell protrusivity and cell surface area, while the two largest contributions to PC2 were  
463 the nucleus minor axis, and the angle between the cell and nucleus.

464 For control cells in PC space, coverslip proximal cells formed a cluster with lower variance than  
465 coverslip distal cells. Coverslip distal cells explore shapes characterised by reduced protrusivity  
466 and cell surface area (higher PC1) and lower nucleus minor axis and greater angle between cell  
467 and nucleus (lower PC2). We found that depletion of some Rho-regulators generated overlap  
468 between proximal and distal cells in PC space (Fig 3A). For example, this overlap was substantial  
469 for cells depleted for *FARP1*. This was true but to a lesser extent for *ARHGEF35* and *SRGAP1*-

470 depleted cells. The shape convergence we saw in PC space was visually supported by generating  
471 stacked-MIPs of 200 cells (Fig 3C), which indicated greater similarity between proximal and distal  
472 cells for *FARP1*, compared to control. Taken together we identify *FARP1*, *ARHGEF35* and  
473 *SRGAP1* as important for reducing differences in shape between proximal and distal contexts  
474 (Fig 3A-C).

475 Here we have shown that proximal and distal positioned WM266.4 melanoma cells are separable  
476 in PC space based on a small set of shape features, and this separation can be disrupted by  
477 depletion of some Rho-regulators. The ability to disrupt shape changes indicates that the shape  
478 differences between proximal and distal cells are not just biophysical responses to changes in the  
479 physical environment but are active transitions mediated (at least in part) by the signalling of Rho-  
480 regulators.

481

## 482 The effect of Rho-regulators on cell shape is environmentally 483 constrained

484 Visualisation in PC space also suggested that Rho-regulators have stronger and more  
485 stereotyped effects on cell shape in proximal compared to distal cells. In the proximal cells we  
486 found that our four global shape features were sufficient to separate many Rho-regulator depleted  
487 cells from control treated WM266.4 melanoma. This was especially the case for *SRGAP1*,  
488 *FARP1*, *TIAM2*, *RND3* and *DOCK5* (Fig 3D), where depletion of these proteins in proximal cells  
489 created combinations of shape features that were separable from control treated WM266.4  
490 melanoma cells. This was in contrast to the distal context, where cell shape features overlapped  
491 between control WM266.4 melanoma and Rho-regulator depletion (Fig 3D), and where cell  
492 shapes were more widely distributed in PC space (Fig 3D).

493 This supported our finding that Rho-regulators have a potent and stereotypic effect on cell shape,  
494 but this effect depends on distance of the cell from the glass coverslip. Our data suggests that for  
495 distal cells the physical environment has an overarching control on shape and increases variability  
496 in cell shape.

497

## 498 Control of cell protrusivity

499 We next sought to identify specific shape differences that are disrupted by Rho-regulator  
500 depletion, and focused on cell protrusivity. It is critical to understand regulation of cell protrusivity  
501 in WM266.4 melanoma because changes in protrusivity are linked to malignant cell migration. In  
502 the past a comprehensive understanding of the genetic control of cell protrusivity has been  
503 confounded by different control of protrusivity between 2D and 3D environments, as well as  
504 between rigid and soft environments. We define protrusivity as 1-ratio of the mask volume to its  
505 convex hull volume (Fig 4A & B). This is similar to the spreading metric used by Isogai *et al* [45].  
506 Increases in our protrusivity metric correlate with the number of cell protrusions, but also the  
507 increased length of cell protrusions, and the angle between cell protrusions.

508 To understand how specific Rho-regulators control protrusivity when positioned near or far from  
509 a rigid substrate, we compared median cell protrusivity of control and Rho-regulator depleted  
510 WM266.4 melanoma cells. To account for the effect of cell microenvironment we made these  
511 comparisons separately for proximal and distal cells (Fig 4C & D). In cells proximal to the  
512 coverslip, depletion of *FARP1*, *TIAM2*, *DOCK5* and *RND3* each decreased protrusivity (Fig 4D).  
513 In the distal context only, cells depleted for *TIAM2* had reduced protrusivity compared to the control  
514 WM266.4 melanoma cells (Fig 4D). *TIAM2*, the Rho-regulator that controlled protrusivity in distal  
515 cells, also controlled protrusivity in proximal embedded cells, suggesting control of a particular  
516 shape process near to the glass coverslip is associated with the ability to control the same process



517 far from the glass coverslip. We noted that *RND3* and *DOCK5* depleted cells both appeared to be  
518 associated with a reduction in cell protrusivity but also cell number (Fig 4C). Compared to control,  
519 the average number of cells in wells depleted of *DOCK5* and *RND3* was reduced to approximately  
520 65 and 77 percent, respectively. Therefore to focus on changes in protrusivity that were directly  
521 related to shape control without complications introduced by cell survival, we continued our  
522 analysis with *FARP1* and *TIAM2*.

523 We visualised protrusivity in *FARP1* and *TIAM2* depleted cells using CAAX-GFP signal from  
524 proximal and distal cells (Fig 4E) as well as through stacked-MIPs (Fig 4F). This confirmed that  
525 *FARP1* depleted cells are round when close to the coverslip, but have protrusivity similar to control  
526 cells when positioned away from the coverslip (Fig 4E & F). In contrast, *TIAM2* depleted cells  
527 were round in both environmental contexts (Fig 4E & F). Taken together these results suggest  
528 that in our collagen system control of protrusivity is environment-stiffness dependent for *FARP1*  
529 but independent of environment for *TIAM2*.

530

## 531 Scale of regulation of protrusivity

532 Next we looked to find the distance over which protrusivity changes as cells are positioned away  
533 from the coverslip in untreated cells. We also looked to characterise the different ranges or  
534 distances over which *FARP1* and *TIAM2* control protrusivity. To resolve this we binned cells over  
535 two micron intervals and plotted the mean cell protrusivity for distances up to 20 microns from the  
536 coverslip (Fig 5A). We found that compared to control, *FARP1* and *TIAM2* are each required for  
537 cell protrusivity in cells with nuclei positioned up to 7-8 microns from the glass coverslip, but that  
538 for distances beyond this only *TIAM2* is required for protrusivity (Fig 5A & B).

539 To visualise the changes in protrusion that occur with distance from the coverslip, we plotted  
540 stacked-MIPs in the XZ plane at a range of intervals for cells within the first 20 microns from the  
541 coverslip (Fig 5C). This confirmed that *FARP1* depleted cells regain protrusivity beginning at  
542 distances around 8-10 microns from the coverslip, and appear similar to control cells at distances  
543 of 12 or more microns from the coverslip. Visual inspection also confirmed that *TIAM2* treated  
544 cells have a large reduction in protrusivity at all distances from the coverslip (Fig 5C).

545 Here our genetic perturbation data indicates that - for the gel used in this study - distances on the  
546 order of 7 microns mark a threshold, beyond which the molecular control of protrusivity is 'handed  
547 over' from *FARP1* to other shape regulators including *TIAM2*. This suggests a model where the  
548 control of protrusivity relies on both *TIAM2* and *FARP1* in the micro-environment close to the  
549 coverslip, but that control of protrusivity 'switches' to rely on *TIAM2* in the environment further  
550 away from the coverslip (Fig 5D). These context specific roles may reflect different abilities of  
551 *FARP1* and *TIAM2* to engage with distinct states of the cytoskeleton. For instance *FARP1*  
552 signalling may engage with the filamentous actin and stable integrin adhesions known to be  
553 present in coverslip cultured cells. In contrast *TIAM2* may be important in cytoskeletal states in  
554 soft gels, such as the absence of actin stress fibers.

555

## 556 Control of cell height

557 In 2D tissue culture systems cells only contact their growth substrate at the basal surface. This  
558 means that changes in cell geometry are largely restricted to the plane of the tissue culture surface  
559 (the XY plane). In contrast, cells growing in a 3D context are embedded within their growth  
560 substrate and have greater opportunity to change geometry in the XZ plane. The axial extent, or  
561 extension of a cell and nucleus into the XZ plane (Fig 6A) have each been linked to migration and  
562 control of cell geometry [2,3,46], and the orientation of the cell and nucleus with respect to each

563 other (Fig 6E) are connected to cell migration and disease states [46]. Due to the importance of  
564 cell and nuclear height, and cell-nuclear orientation in disease, we examined the influence of  
565 *FARP1* and *TIAM2* on these features.

566 First, we plotted the relationship between cell and nucleus axial extent (the ‘height’ of the nucleus  
567 or cell) for all control, *FARP1* and *TIAM2* depleted WM266.4 melanoma cells that had their nuclei  
568 positioned within 20 microns of the coverslip (Fig 6B). This plot pooled both proximal and distal  
569 cells and indicated a positive relationship between normalised cell and nuclear height at the single  
570 cell level (Fig 6B). We also plotted frequency histograms for cell and nuclear height and noted  
571 that *FARP1* depleted cells had a shift towards increased cell and nuclear height (Fig 6B).

572 To visualise how cell and nuclear axial extent (height) change with distance from the coverslip we  
573 binned cells by the position of their nucleus at one micron intervals, and calculated the average  
574 cell and nucleus height (Fig 6C), as well as nuclear position. We used this information to generate  
575 ‘glyphs’ of cells that give an indication of how the relationship between cell and nucleus changes  
576 with distance of the nucleus from the coverslip (Fig 6C). This plot suggested that *FARP1* depleted  
577 cells increase their height when nuclei are within 7 microns of the coverslip, but are similar to  
578 control cells for distance beyond 7 microns. In contrast, we found that the height of *TIAM2*  
579 depleted cells are similar to control cells within the first 7 microns of the coverslip, but are reduced  
580 in height for distances beyond this. Statistical testing of the difference in height between proximal  
581 and distal cells supported these observations (Fig 6D).

582 The increase in height for *FARP1* depleted cells might be attributable to the concomitant increase  
583 in nuclear height (Fig 6B). Changes in nuclear height on rigid surfaces have previously been  
584 linked to maintenance of the perinuclear actin cap [46,47]. In contrast, the changes in cell height  
585 in *TIAM2* depleted cells (Fig 6C and 6D) are likely to be driven by reduced protrusivity in cells  
586 away from the coverslip (Fig 4B-D), rather than directly by changes in nuclear geometry.

587 Considered together, these results show that *FARP1* and *TIAM2* are each required to regulate  
588 cell height, but that they regulate height in different micro-environmental contexts.

589

## 590 Control of cell and nuclear coupling

591 Finally, we considered coupling of cell and nuclear orientation (Fig 6E and 6F). Coupling of cell  
592 and nuclear orientation is frequently observed in mammalian cell systems, where it is important  
593 for cell mechanotransduction and cell migration but this relationship breaks down in disease  
594 contexts. To measure cell and nuclear coupling we calculated the angle between the orientation  
595 of the major axis of the cell and the nucleus. We looked for changes in cell and nuclear coupling  
596 by generating probability density plots for control WM266.4 melanoma, as well as cells depleted  
597 for *FARP1* and *TIAM2*.

598 Consistent with previous studies, we found that in control treated WM266.4 melanoma cells there  
599 is a tight coupling of cell and nuclear orientation in proximal cells (Fig 6F). We found that this  
600 coupling is reduced in cells with their nuclei positioned distal to the coverslip (Fig 6F). Given that  
601 previous studies have also seen that changes in nuclear height are associated with breakdown  
602 of cell and nuclear coupling [47], we examined this in *FARP1* depleted cells and saw a tendency  
603 for increases in the angle between the cell and the nucleus in proximal cells.

604

605 Comparison of cell shape in distinct environments reveals TIAM2  
606 and FARP1 control a range of shape features but in different  
607 physical environments.

608 Due to the importance of cell protrusivity in disease, we have focused on this metric of cell shape  
609 and found a context-dependent control of protrusivity by a subset of Rho-regulators (Fig 4A-B).  
610 However, we have found that shape differences between proximal and distal environments can  
611 be characterised by the changes in three additional shape measures (Fig 3A). Therefore we  
612 considered how each of the Rho-regulators in our study controlled these individual shape  
613 features, and whether this control is physical context specific (Fig 6A-D). To test the effect of Rho-  
614 regulators across a range of shape features, we analysed well-median values for each of our  
615 global geometry features and compared them between Rho-regulator depleted cells and control  
616 cells. Comparisons were made using Kruskal-Wallis and Dunn's tests to compare controls to  
617 treatment.

618 For cells proximal to the coverslip, we found that depletion of many Rho-regulators were able to  
619 change multiple shape features. The broadest acting shape controllers in proximal cells were  
620 *FARP1*, *DOCK5*, *TIAM2* and *RND3*. The proteins that acted on fewer features were *ARHGEF9*  
621 and *ARHGEF35*. *PREX2* did not significantly change any shape features in this study (Fig 7A). In  
622 contrast, for distal cells we found that cell geometry was relatively robust to depletion of the same  
623 Rho-regulators (Fig 7B), and that fewer shape features were significantly changed by Rho-  
624 regulator depletion.

625 To summarise the breadth and context specificity of shape control by Rho-regulators in our study,  
626 we generated a shape control matrix (Fig 7C). This highlights *DOCK5* and *TIAM2* as controlling  
627 shape features in both proximal and distal contexts (Fig 7C). In contrast, *FARP1* and *RND3* stand

628 out as broad-acting shape regulators that significantly changed each shape feature measured,  
629 but were only effective in proximal or rigid physical regimes (Fig 7C).

630

## 631 **Discussion**

632 Living cells have evolved myriad ways to change their shape in response to the physical  
633 properties of their environment. For example, a response to the environment has been linked to  
634 Rho GTPase activity and the modulation of Rho GTPases by RhoGEFs and RhoGAPs.

635 A full understanding of how cells change their shape in response to environmental cues is a major  
636 challenge in biology. Classic work on this problem has been conducted in 2D tissue culture  
637 paradigms, and more recently, work has been done in 3D settings. However, technical limitations  
638 have made it difficult to study the effect of RhoGEFs and RhoGAPs in multiple environments at  
639 the same time. For microscopy systems these limitations include the challenge of achieving high  
640 3D spatial resolution and the high throughput when imaging thousands of cells simultaneously.  
641 Here, we have used ssOPM to address these challenges by imaging thousands of cells in  
642 collagen and in two distinct physical contexts. This approach creates an opportunity to understand  
643 how cells respond to different geometrical and mechanical cues, and how a genetic perturbation  
644 affects this response. We find that control treated WM266.4 melanoma cells have reduced  
645 protrusivity and become more heterogeneous when positioned away from the coverslip. A  
646 systematic depletion of Rho-Regulators revealed genes that modulate this transition. In particular  
647 our data suggest that *TIAM2* and *FARP1* ordinarily function to promote protrusions in coverslip  
648 proximal cells (Fig 4 and Fig 5). The context dependence of *FARP1* strongly suggests a role for  
649 FARP1 signalling in shape transition when cells are positioned away from rigid micro-  
650 environments.

651

## 652 Stage scanning oblique plane microscopy for measuring cell

### 653 shape

654 This assay allowed investigation of the shape of large numbers of cells at different positions in  
655 collagen. It takes advantage of many aspects of stage scanning OPM. As a light sheet technique,  
656 this method was fast. 50 volumes (corresponding to 10000 cells) were acquired in 90 minutes.  
657 This method was compatible with standard multiwell plates. This simplified the assay as standard  
658 sample preparations could be used. Nine siRNA knockdowns plus control conditions were imaged  
659 on each plate. Stage scanning allowed a large volume ( $4.2 \times 0.32 \times 0.144 \text{ mm}^3$ ) to be imaged,  
660 corresponding to ~200 cells per volume. Notably the 144  $\mu\text{m}$  z range allowed coverslip proximal  
661 and distal cells to be imaged in the same scan. This ensures values can be internally controlled.  
662 Cell segmentation and shape analysis was performed entirely in 3D. This allowed measurements  
663 of inherently 3D features including cell and nucleus axial extent.

664

### 665 Validation of imaging metrics

666 A challenge for quantitative measurements in LSFM is that the PSF varies depending on where  
667 the sample is in the light sheet. For instance, the larger light sheet at the top and bottom of the  
668 ssOPM field of view may lead to cells appearing larger. To check for this, we imaged the same  
669 (fixed) cells positioned at different points in the light sheet by adjusting the position of the sample  
670 with respect to O1. Based on this we found that the spatially varying light sheet had a distorting  
671 effect on cell volume when imaging thin flat cells on the coverslip, and this metric was excluded

672 from our analysis. For the other metrics used in this paper the biological effect was found to  
673 dominate over any PSF effect.

674 In LSFM the PSF is typically anisotropic due to the low excitation NA compared to detection. In  
675 the ssOPM system used here the resolution was ( $0.5 \times 0.5 \times 3.8 \mu\text{m}^3$ – $0.5 \times 0.5 \times 5 \mu\text{m}^3$  depending on  
676 position in the light sheet). This may lead to cells which have a dimension  $< 5 \mu\text{m}$  to be extended  
677 in the light sheet direction, depending on orientation. Deconvolution could be used to reduce this  
678 effect [48] but 3D deconvolution of large datasets is slow and does not take into account the  
679 spatially varying light sheet. As a simple test we eroded segmented masks with a structured  
680 element object similar to the PSF. The same cell shape changes were found with both eroded  
681 and uneroded masks. This suggests that, for this dataset, the PSF shape did not have a significant  
682 effect compared to the biological effects.

683 A wide range of segmentation approaches can be used in fluorescence microscopy. We tested  
684 intensity and active-contour-based segmentation. By visual inspection both methods produced  
685 good masks of cells and nuclei. We further found that we would draw the same conclusions from  
686 our data using either method.

687

## 688 Cell protrusions

689 Cell protrusivity is essential for cell migration in normal development and metastasis during  
690 disease. However, modes of cellular protrusion are context dependent and vary with cell type,  
691 chemical and physical environment [7,49]. In 2D cell culture systems, two major modes of  
692 protrusion formation are hydrostatic blebbing and actin based protrusivity [50–52]. Hydrostatic  
693 blebbing is *RHO-ROCK* dependent and contributes to what is often described as ‘ameboid’



694 migration in WM266.4 melanoma cells. In contrast, actin-based protrusion is often described as  
695 ‘mesenchymal’ and relies on *RAC* regulated lamellipodia and *CDC42* regulated filopodia.

696 In the present study we use WM266.4 cells that have low levels of Rho GTP and produce both  
697 hydrostatic blebs and actin based protrusion but are thought to be predominately mesenchymal  
698 [7]. We also use a collagen concentration and polymerisation temperature associated with the  
699 formation of highly reticular collagen networks, and nascent, unstable integrin-based adhesions  
700 with low contractility [53].

701 In this setting we identified *FARP1*, *TIAM2*, *RND3* and *DOCK5* as regulating protrusivity when  
702 cell nuclei are proximal to the coverslip. In future it will be interesting to distinguish changes in the  
703 amount of hydrostatic blebbing from actin-based pseudopodial protrusions by simultaneously  
704 assessing plasma membrane and actin markers in the context of Rho-regulator depletion to  
705 determine whether either type of protrusion is specifically controlled by these Rho-regulators.  
706 Notably we also highlighted Rho-regulators where depletion increased cell protrusivity. In  
707 particular, reduction of *PREX2* and *SRGAP1* tended to increase protrusivity indicating that these  
708 Rho-regulators normally function to repress protrusivity, however these changes did not reach  
709 statistical significance in this study.

710

## 711 Context specific protrusivity control

712 We found that most Rho-regulators were context dependent in the sense that they were more  
713 potent in controlling protrusivity close to the coverslip. This may reflect major cell biological and  
714 cytoskeletal changes that take place in response to rigidity sensing [54,55]. For example, *FARP1*,  
715 *RND3* and *DOCK5* may modulate protrusivity through mechanisms that depend on the  
716 abundance of integrin adhesions and filamentous actin organised into stress fibres, which are

717 associated with rigid substrates. In contrast *TIAM2* was required for protrusion formation both  
718 proximal to and far from the coverslip and may promote protrusivity independent from  
719 environmental stiffness.

720

## 721 Changes in nuclear shape and alignment

722 For cells in close proximity to the coverslip, the reduced protrusivity in *FARP1*-depleted cells was  
723 associated with an increase in nuclear axial extent (Fig 6C) and reduced coordination in the angle  
724 of elongation between cell and nucleus (Fig 6F). Interestingly, increased nuclear height and  
725 decreased coupling of cell-nuclear orientation were recently reported for loss of *TIAM2* [47]. In  
726 the case of *TIAM2*, increased nuclear height has been attributed to loss of nuclear capping actin,  
727 and uncoordinated cell and nuclear orientation has been attributed to dysfunction of the  
728 perinuclear actin cage [47]. In future it will be interesting to determine whether *FARP1* regulates  
729 perinuclear actin cap morphology, or is controlling nuclear axial extent by a separate mechanism.

730

## 731 Effective stiffness gradients and cell and nuclear environmental 732 sensing

733 Our experimental setup used cells seeded into collagen and plated on top of glass. We interpret  
734 this set-up as creating an effective 'stiffness gradient', where the elastic properties of the collagen  
735 proximal to the glass are influenced by the rigidity of the glass. At distances further from the glass  
736 the cells experience the greater elasticity of the collagen. Using this paradigm, we found major  
737 changes in cell shape when the base of cell nuclei are at distances on the order of 7 micrometers  
738 from the coverslip. The average nuclear diameter in our dataset was on the order of 16

739 micrometers. This suggests that cells respond to changes in their physical environment such as  
740 stiffness and surface geometry, over scales that are smaller than the dimensions of the nucleus.

741 An important question raised by our data, is whether it is the cell or nucleus that is sensing and  
742 responding to the physical environment as nuclei become positioned further away from the glass  
743 coverslip. Nuclear deformation is known to be directly linked to changes in gene expression and  
744 cell shape [56,57]. Moreover, recently new mechanisms of nuclear environment sensing have  
745 been elucidated, whereby stretching and deformation of the nuclear membrane leads to the  
746 release of calcium, increasing myosin contractility and cell shape change [2,3].

747

## 748 **Conclusions**

749 In this study we use the ability of ssOPM to image thousands of melanoma cells spanning 2D and  
750 3D collagen environments. We find cells make characteristic changes between 2D and 3D and  
751 that these changes can be modified by depletion of Rho-regulators. We find that cells in 3D  
752 environments tend to reduce their protrusivity and their protrusivity also becomes more varied  
753 and heterogeneous. Our data also suggest that cells respond to changes in environmental  
754 parameters such as stiffness and geometry, over scales that are smaller than the diameter of the  
755 nucleus. Furthermore, we identify *TIAM2* and *FARP1* as each controlling cell protrusivity but in  
756 different physical contexts. Taken together our data indicate general reliance on *TIAM2* for cell  
757 protrusivity, and a context dependent switch from *FARP1* dependent to *FARP1* independent  
758 control of protrusion between 2D and 3D settings.

759

## 760 **Funding**

761 This work was funded by a UK Engineering and Physical Sciences Research Council Impact  
762 Acceleration grant (EP/K503733/1) and a Cancer Research UK Multidisciplinary Project Award  
763 (C53737/A24342). C.B is funded by a Cancer Research UK and Stand Up to Cancer UK  
764 Programme Foundation Award to C.B. (C37275/1A20146).

765

## 766 **Acknowledgements**

767 The authors wish to acknowledge the expert help of Martin Kehoe, Simon Johnson and John  
768 Murphy in the Optics Workshop of the Photonics Group of Imperial College London who  
769 contributed to the design and fabrication of components for the light-sheet microscope system.

770

## 771 **Disclosures**

772 C.D has a licensed granted patent on OPM.

773

## 774 **References**

- 775 1. Geiger B, Spatz JP, Bershadsky AD. Environmental sensing through focal adhesions. Nat  
776 Rev Mol Cell Biol. 2009;10: 21–33. doi:10.1038/nrm2593
- 777 2. Venturini V, Pezzano F, Castro FC, Häkkinen H-M, Jiménez-Delgado S, Colomer-Rosell

- 778 M, et al. The nucleus measures shape changes for cellular proprioception to control  
779 dynamic cell behavior. *Science*. 2020;370. doi:10.1126/science.aba2644
- 780 3. Lomakin AJ, Cattin CJ, Cuvelier D, Alraies Z, Molina M, Nader GPF, et al. The nucleus  
781 acts as a ruler tailoring cell responses to spatial constraints. *Science*. 2020;370.  
782 doi:10.1126/science.aba2894
- 783 4. Martino F, Perestrelo AR, Vinarský V, Pagliari S, Forte G. Cellular Mechanotransduction:  
784 From Tension to Function. *Front Physiol*. 2018;9. doi:10.3389/fphys.2018.00824
- 785 5. Kechagia JZ, Ivaska J, Roca-Cusachs P. Integrins as biomechanical sensors of the  
786 microenvironment. *Nat Rev Mol Cell Biol*. 2019; 1. doi:10.1038/s41580-019-0134-2
- 787 6. Spill F, Reynolds DS, Kamm RD, Zaman MH. Impact of the physical microenvironment on  
788 tumor progression and metastasis. *Curr Opin Biotechnol*. 2016;40: 41–48.  
789 doi:10.1016/j.copbio.2016.02.007
- 790 7. Sahai E, Marshall CJ. Differing modes of tumour cell invasion have distinct requirements  
791 for Rho/ROCK signalling and extracellular proteolysis. *Nat Cell Biol*. 2003;5: 711–719.  
792 doi:10.1038/ncb1019
- 793 8. Cooper S, Sadok A, Bousgouni V, Bakal C. Apolar and polar transitions drive the  
794 conversion between amoeboid and mesenchymal shapes in melanoma cells. *Mol Biol Cell*.  
795 2015;26: 4163–4170. doi:10.1091/mbc.E15-06-0382
- 796 9. Wolf K, Mazo I, Leung H, Engelke K, von Andrian UH, Deryugina EI, et al. Compensation  
797 mechanism in tumor cell migration : mesenchymal–amoeboid transition after blocking of  
798 pericellular proteolysis. *J Cell Biol*. 2003;160: 267–277. doi:10.1083/jcb.200209006
- 799 10. Petrie RJ, Gavara N, Chadwick RS, Yamada KM. Nonpolarized signaling reveals two  
800 distinct modes of 3D cell migration. *J Cell Biol*. 2012;197: 439–455.  
801 doi:10.1083/jcb.201201124
- 802 11. Sanz-Moreno V, Gadea G, Ahn J, Paterson H, Marra P, Pinner S, et al. Rac Activation and  
803 Inactivation Control Plasticity of Tumor Cell Movement. *Cell*. 2008;135: 510–523.

- 804           doi:10.1016/j.cell.2008.09.043
- 805   12. Online Materials Information Resource - MatWeb. [cited 6 May 2021]. Available:  
806           <http://www.matweb.com/index.aspx>
- 807   13. Yamada KM, Sixt M. Mechanisms of 3D cell migration. *Nat Rev Mol Cell Biol.* 2019;20:  
808           738–752. doi:10.1038/s41580-019-0172-9
- 809   14. Baker EL, Srivastava J, Yu D, Bonnacaze RT, Zaman MH. Cancer Cell Migration:  
810           Integrated Roles of Matrix Mechanics and Transforming Potential. *PLoS ONE.* 2011;6.  
811           doi:10.1371/journal.pone.0020355
- 812   15. Joshi J, Mahajan G, Kothapalli CR. Three-dimensional collagenous niche and azacytidine  
813           selectively promote time-dependent cardiomyogenesis from human bone marrow-derived  
814           MSC spheroids. *Biotechnol Bioeng.* 2018;115: 2013–2026.  
815           doi:<https://doi.org/10.1002/bit.26714>
- 816   16. McBane JE, Vulesevic B, Padavan DT, McEwan KA, Korbutt GS, Suuronen EJ. Evaluation  
817           of a Collagen-Chitosan Hydrogel for Potential Use as a Pro-Angiogenic Site for Islet  
818           Transplantation. *PLOS ONE.* 2013;8: e77538. doi:10.1371/journal.pone.0077538
- 819   17. Joo S, Oh S-H, Sittadjody S, Opara EC, Jackson JD, Lee SJ, et al. The effect of collagen  
820           hydrogel on 3D culture of ovarian follicles. *Biomed Mater.* 2016;11: 065009.  
821           doi:10.1088/1748-6041/11/6/065009
- 822   18. Tian Z, Liu W, Li G. The microstructure and stability of collagen hydrogel cross-linked by  
823           glutaraldehyde. *Polym Degrad Stab.* 2016;130: 264–270.  
824           doi:10.1016/j.polymdegradstab.2016.06.015
- 825   19. Jiang T, Xu G, Chen X, Huang X, Zhao J, Zheng L. Impact of Hydrogel Elasticity and  
826           Adherence on Osteosarcoma Cells and Osteoblasts. *Adv Healthc Mater.* 2019;8: 1801587.  
827           doi:<https://doi.org/10.1002/adhm.201801587>
- 828   20. Reversat A, Gaertner F, Merrin J, Stopp J, Tasciyan S, Aguilera J, et al. Cellular  
829           locomotion using environmental topography. *Nature.* 2020;582: 582–585.

- 830           doi:10.1038/s41586-020-2283-z
- 831   21. Lämmermann T, Sixt M. Mechanical modes of ‘amoeboid’ cell migration. *Curr Opin Cell*  
832       *Biol.* 2009;21: 636–644. doi:10.1016/j.ceb.2009.05.003
- 833   22. Wolf K, Müller R, Borgmann S, Bröcker E-B, Friedl P. Amoeboid shape change and  
834       contact guidance: T-lymphocyte crawling through fibrillar collagen is independent of matrix  
835       remodeling by MMPs and other proteases. *Blood.* 2003;102: 3262–3269.  
836       doi:10.1182/blood-2002-12-3791
- 837   23. Brábek J, Mierke CT, Rösel D, Veselý P, Fabry B. The role of the tissue microenvironment  
838       in the regulation of cancer cell motility and invasion. *Cell Commun Signal CCS.* 2010;8: 22.  
839       doi:10.1186/1478-811X-8-22
- 840   24. Ridley AJ. Rho GTPase signalling in cell migration. *Curr Opin Cell Biol.* 2015;36: 103–112.  
841       doi:10.1016/j.ceb.2015.08.005
- 842   25. Lawson CD, Ridley AJ. Rho GTPase signaling complexes in cell migration and invasion. *J*  
843       *Cell Biol.* 2018;217: 447–457. doi:10.1083/jcb.201612069
- 844   26. Müller PM, Rademacher J, Bagshaw RD, Wortmann C, Barth C, van Unen J, et al.  
845       Systems analysis of RhoGEF and RhoGAP regulatory proteins reveals spatially organized  
846       RAC1 signalling from integrin adhesions. *Nat Cell Biol.* 2020;22: 498–511.  
847       doi:10.1038/s41556-020-0488-x
- 848   27. Rossman KL, Der CJ, Sondek J. GEF means go: turning on RHO GTPases with guanine  
849       nucleotide-exchange factors. *Nat Rev Mol Cell Biol.* 2005;6: 167–180.  
850       doi:10.1038/nrm1587
- 851   28. Kutys ML, Yamada KM. An extracellular matrix-specific GEF-GAP interaction regulates  
852       Rho GTPase crosstalk for 3D collagen migration. *Nat Cell Biol.* 2014;16: 909.  
853       doi:10.1038/ncb3026
- 854   29. Boureux A, Vignal E, Faure S, Fort P. Evolution of the Rho family of ras-like GTPases in  
855       eukaryotes. *Mol Biol Evol.* 2007;24: 203–216. doi:10.1093/molbev/msl145

- 856 30. Maioli V, Chennell G, Sparks H, Lana T, Kumar S, Carling D, et al. Time-lapse 3-D  
857 measurements of a glucose biosensor in multicellular spheroids by light sheet fluorescence  
858 microscopy in commercial 96-well plates. *Sci Rep*. 2016;6: 37777. doi:10.1038/srep37777
- 859 31. Dunsby C. Optically sectioned imaging by oblique plane microscopy. *Opt Express*.  
860 2008;16: 20306–20316. doi:10.1364/OE.16.020306
- 861 32. Kumar S, Wilding D, Sikkell MB, Lyon AR, MacLeod KT, Dunsby C. High-speed 2D and 3D  
862 fluorescence microscopy of cardiac myocytes. *Opt Express*. 2011;19: 13839–13847.  
863 doi:10.1364/OE.19.013839
- 864 33. Botcherby EJ, Juskaitis R, Booth MJ, Wilson T. Aberration-free optical refocusing in high  
865 numerical aperture microscopy. *Opt Lett*. 2007;32: 2007–2009. doi:10.1364/OL.32.002007
- 866 34. Time-lapse 3-D measurements of a glucose biosensor in multicellular spheroids by light  
867 sheet fluorescence microscopy in commercial 96-well plates | *Scientific Reports*. [cited 16  
868 Sep 2020]. Available: <https://www.nature.com/articles/srep37777>
- 869 35. Maioli VA. High-speed 3-D fluorescence imaging by oblique plane microscopy: multi-well  
870 plate-reader development, biological applications and image analysis. 2016 [cited 27 May  
871 2021]. doi:10.25560/68022
- 872 36. Schindelin J, Arganda-Carreras I, Frise E, Kaynig V, Longair M, Pietzsch T, et al. Fiji: an  
873 open-source platform for biological-image analysis. *Nat Methods*. 2012;9: 676–682.  
874 doi:10.1038/nmeth.2019
- 875 37. Sikkell MB, Kumar S, Maioli V, Rowlands C, Gordon F, Harding SE, et al. High speed  
876 sCMOS-based oblique plane microscopy applied to the study of calcium dynamics in  
877 cardiac myocytes. *J Biophotonics*. 2016;9: 311–323. doi:10.1002/jbio.201500193
- 878 38. Buxboim A, Rajagopal K, Brown AEX, Discher DE. How deeply cells feel: methods for thin  
879 gels. *J Phys Condens Matter Inst Phys J*. 2010;22. doi:10.1088/0953-8984/22/19/194116
- 880 39. Maloney JM, Walton EB, Bruce CM, Van Vliet KJ. Influence of finite thickness and stiffness  
881 on cellular adhesion-induced deformation of compliant substrata. *Phys Rev E Stat Nonlin*



- 882           Soft Matter Phys. 2008;78: 041923. doi:10.1103/PhysRevE.78.041923
- 883   40.   Merkel R, Kirchgeßner N, Cesa CM, Hoffmann B. Cell Force Microscopy on Elastic Layers  
884           of Finite Thickness. Biophys J. 2007;93: 3314–3323. doi:10.1529/biophysj.107.111328
- 885   41.   Sen S, Engler AJ, Discher DE. Matrix strains induced by cells: Computing how far cells can  
886           feel. Cell Mol Bioeng. 2009;2: 39–48. doi:10.1007/s12195-009-0052-z
- 887   42.   Solon J, Levental I, Sengupta K, Georges PC, Janmey PA. Fibroblast Adaptation and  
888           Stiffness Matching to Soft Elastic Substrates. Biophys J. 2007;93: 4453–4461.  
889           doi:10.1529/biophysj.106.101386
- 890   43.   Wilkinson S, Paterson HF, Marshall CJ. Cdc42-MRCK and Rho-ROCK signalling  
891           cooperate in myosin phosphorylation and cell invasion. Nat Cell Biol. 2005;7: 255–261.  
892           doi:10.1038/ncb1230
- 893   44.   Yin Z, Sadok A, Sailem H, McCarthy A, Xia X, Li F, et al. A Screen for Morphological  
894           Complexity Identifies Regulators of Switch-like Transitions between Discrete Cell Shapes.  
895           Nat Cell Biol. 2013;15: 860–871. doi:10.1038/ncb2764
- 896   45.   Isogai T, Dean KM, Roudot P, Shao Q, Cillay JD, Welf ES, et al. Direct Arp2/3-vinculin  
897           binding is essential for cell spreading, but only on compliant substrates and in 3D. bioRxiv.  
898           2019; 756718. doi:10.1101/756718
- 899   46.   Kim D-H, Cho S, Wirtz D. Tight coupling between nucleus and cell migration through the  
900           perinuclear actin cap. J Cell Sci. 2014;127: 2528–2541. doi:10.1242/jcs.144345
- 901   47.   Woroniuk A, Porter A, White G, Newman DT, Diamantopoulou Z, Waring T, et al.  
902           STEF/TIAM2-mediated Rac1 activity at the nuclear envelope regulates the perinuclear  
903           actin cap. Nat Commun. 2018;9. doi:10.1038/s41467-018-04404-4
- 904   48.   Preibisch S, Amat F, Stamatakis E, Sarov M, Singer RH, Myers E, et al. Efficient Bayesian-  
905           based multiview deconvolution. Nat Methods. 2014;11: 645–648. doi:10.1038/nmeth.2929
- 906   49.   Caswell PT, Zech T. Actin-Based Cell Protrusion in a 3D Matrix. Trends Cell Biol. 2018;28:  
907           823–834. doi:10.1016/j.tcb.2018.06.003

- 908 50. Paluch EK, Raz E. The role and regulation of blebs in cell migration. *Curr Opin Cell Biol.*  
909 2013;25: 582–590. doi:10.1016/j.ceb.2013.05.005
- 910 51. Petrie RJ, Yamada KM. Fibroblasts lead the way: a unified view of three-dimensional cell  
911 motility. *Trends Cell Biol.* 2015;25: 666–674. doi:10.1016/j.tcb.2015.07.013
- 912 52. Charras G, Paluch E. Blebs lead the way: how to migrate without lamellipodia. *Nat Rev*  
913 *Mol Cell Biol.* 2008;9: 730–736. doi:10.1038/nrm2453
- 914 53. Doyle AD, Carvajal N, Jin A, Matsumoto K, Yamada KM. Local 3D matrix  
915 microenvironment regulates cell migration through spatiotemporal dynamics of contractility-  
916 dependent adhesions. *Nat Commun.* 2015;6. doi:10.1038/ncomms9720
- 917 54. Nardone G, Cruz JO-DL, Vrbsky J, Martini C, Pribyl J, Skládal P, et al. YAP regulates cell  
918 mechanics by controlling focal adhesion assembly. *Nat Commun.* 2017;8: ncomms15321.  
919 doi:10.1038/ncomms15321
- 920 55. Gupta M, Sarangi BR, Deschamps J, Nematbakhsh Y, Callan-Jones A, Margadant F, et al.  
921 Adaptive rheology and ordering of cell cytoskeleton govern matrix rigidity sensing. *Nat*  
922 *Commun.* 2015;6: 7525. doi:10.1038/ncomms8525
- 923 56. Isermann P, Lammerding J. Nuclear Mechanics and Mechanotransduction in Health and  
924 Disease. *Curr Biol CB.* 2013;23. doi:10.1016/j.cub.2013.11.009
- 925 57. Dalby MJ, Riehle MO, Yarwood SJ, Wilkinson CDW, Curtis ASG. Nucleus alignment and  
926 cell signaling in fibroblasts: response to a micro-grooved topography. *Exp Cell Res.*  
927 2003;284: 274–282. doi:10.1016/s0014-4827(02)00053-8

## 928 **Figure captions**

929 **Fig 1. Genetic depletion of Rho-regulators in distinct physical contexts and imaging in 3D**  
930 **by oblique plane microscopy.**

931 **A.** Schematic illustration of WM266.4 melanoma cells embedded in collagen at different distances  
932 from coverslip. **B.** Schematic of preliminary shape screens on collagen and list of final Rho-  
933 regulators targeted for depletion. **C.** 3D volume rendering of control cells imaged by ssOPM. **D.**  
934 Maximum intensity projection (MIP) of the full field of view imaged for a single well. **E.** Example  
935 MIPs of zoomed regions for the nine different Rho-regulator siRNA treatments. Cells are marked  
936 by CAAX-GFP (yellow) and nuclei are marked by DRAQ5 (magenta). Images are from plate 2  
937 row E. Scale bars are 100 microns.

938

939 **Fig 2. There are characteristic shape changes between cells with nuclei positioned away**  
940 **from a rigid substrate.**

941 **A.** Hierarchical clustering of cell and nuclear features, showing partitioning into four groups of  
942 correlated features (top row of grey boxes), and the feature selected to represent each group  
943 (bottom row of grey boxes). Right hand side shows a correlation matrix between the four shape  
944 features selected for analysis (also labelled 'i', 'ii', 'iii' and 'iv'). The matrix indicates the direction  
945 and magnitude of correlation between these features. **B.** Comparison of shape features between  
946 cells with nuclei 'proximal' to the coverslip (blue) and 'distal' to the coverslip (orange). Cells with  
947 the base of nucleus less than 7 microns from the coverslip are proximal, and cells with the base  
948 of nuclei greater than 7 microns are distal. Violin plots show the distribution of single cells (grey  
949 filled region). Also shown are well medians (coloured points), and plate medians (coloured

950 rhomboids). Each colour indicates data from a different experimental plate. Statistical tests are  
951 paired Wilcoxon tests of data from 3 independent experiments aggregated at the 'well' level. **C.** Cell  
952 segmentation masks from XZ MIPs from an exemplar field of view showing separation of cells  
953 into proximal and distal groups on the basis of nucleus distance from the coverslip. **D.** Examples  
954 of the heterogeneity in protrusivity that is inherent amongst proximal control treated cells. Plots of  
955 shape outlines from cells in three groups: below average ( $-2\sigma$  to  $-1\sigma$ ); near average ( $-1\sigma$  to  $1\sigma$ );  
956 and above average ( $1\sigma$  to  $2\sigma$ ). **E.** Comparison of the estimated probability density for protrusivity  
957 between proximal (blue shading) and distal cells (orange shading). Points show data at the well  
958 level. Point colours indicate replicate experimental plates, and are the same as in B. **F.** Images  
959 are stacked maximum intensity projections of cell outlines (as in D), for cells with protrusivity at  
960 different ranges from the median.  $n = 35$  cells per projection.

961

962 **Fig 3. Depletion of Rho-regulators can disrupt shape differences between cells with nuclei**  
963 **at different distances from a rigid substrate.**

964 **A.** Principal components analysis (PCA) plotting of well median values for cell shape features  
965 showing proximal (blue) and distal (orange) cells. In *control* cells, proximal and distal cells are  
966 separated in PCA space. In contrast, treatments such as *FARP1* depletion result in an overlap  
967 between proximal and distal cells in PCA shape space. **B.** Map of how shape features project to  
968 PCA space. **C.** Stacked projections of cell segmentation masks for coverslip proximal or distal  
969 cells that are Control treated or depleted for *FARP1* or *TIAM2*. **D.** PCA plots comparing the effect  
970 of Rho-regulator depletion on shape in cells with nuclei proximal or distal to the coverslip.

971

972 **Fig 4. Depletion of Rho-regulators reveals genes that control protrusivity in broad and**  
973 **specific contexts.**

974 **A.** 2D Projections of cell segmentation masks (black) and convex hull (blue) used to calculate  
975 protrusivity. XY and YZ views are shown. **B.** 3D surface rendering of cells with different measures  
976 of protrusivity. **C.** Single cell plots of cell protrusivity against nucleus distance from the coverslip  
977 in control cells and cells depleted for Rho-regulators. Heatmap indicates density of points for  
978 overplotted regions of each chart. Horizontal dashed magenta line indicates median protrusivity  
979 across the entire dataset. **D.** Comparison of cell protrusivity between cells with depletion of a  
980 range of Rho-regulators for cells with nuclei proximal to the coverslip or distal to the coverslip.  
981 Data are aggregated and plotted at the well level (boxplots and scatterplot points), and at the  
982 plate level (rhomboids) The different colours indicate data from different plates. Statistical tests  
983 are Kruskal-Wallis followed by Dunn's test and are for data aggregated at the well level.  
984 Significance are, \*\*\* =  $p < 0.001$ , \*\* =  $p < 0.01$  and \* =  $p < 0.05$ . **E.** XZ MIPs from exemplar fields  
985 of view showing separation of cells into proximal and distal groups for *control* cells, and cells with  
986 depletion of *FARP1* or *TIAM2* as indicated. **F.** Stacked projections of cells with nuclei proximal or  
987 distal to the coverslip for control cells and cells depleted for *FARP1* or *TIAM2* as indicated.

988

989 **Fig 5. Length scale of physical regulation of protrusivity.**

990 **A.** Cell protrusivity against nucleus distance from coverslip in *control* cells, and cells depleted for  
991 Rho-regulators. Values are the mean of well level measurements. The extent of shading indicates  
992 90 percent confidence intervals, and color of shading indicates mean protrusivity for a treatment  
993 across all distances from coverslip. **B.** Overlay of charts in A for comparison of protrusivity  
994 between *control*, and cells depleted for *TIAM2* or *FARP1*. **C.** Stacked MIPs (XZ plane) indicating  
995 changes in cell shape with distance from the coverslip. **D.** Schematic of control of protrusivity by  
996 *TIAM2* and *FARP1* over a different range of physical parameters.

997

998 **Fig 6. Changes in cell axial extent and cell-nuclear coupling are associated with changes**  
999 **in protrusivity and environment.**

1000 **A.** Schematic of cell (green) and nucleus (magenta) axial extent. **B.** Plot of cell versus nucleus  
1001 axial extent for cells with nuclei within 20 microns of the coverslip. Treatments are as indicated.  
1002 **C.** Stacked bar-chart representation of average cell and axial extent, and nucleus position for cells  
1003 at two micron intervals from the coverslip. Treatments are as indicated. **D.** Comparison of cell  
1004 axial extent for the indicated genotypes. Data aggregated at the well level (boxplots and scatter-  
1005 points), and plate level (rhomboids) are shown. The different colours show data from the 3 plates.  
1006 Statistical tests are Kruskal-Wallis followed by Dunn's test. **E.** Schematic of measurement for  
1007 angle between cell (green) and nucleus (magenta). **F.** Estimated density plots of cell-nuclear  
1008 angle in cells with nuclei proximal or distal to the coverslip. Cell treatments are indicated.

1009

1010 **Fig 7. Comparison of multiple shape features across distinct environments highlights**  
1011 **broad and specific shape controllers.**

1012 **A-B.** Heatmaps indicating significant changes in cell shape features for depletion of Rho-  
1013 regulators when nuclei are proximal (A) and distal (B) to the coverslip. Asterisks in A and B  
1014 indicate significant change compared to control. Statistical test was Dunn's multiple comparisons  
1015 test. **C.** Logical combination of significant changes in A and B highlights genes with specific and  
1016 general control of a range of shape features. For example *TIAM2* shows general shape control  
1017 and affects a range of features in proximal and distal contexts. In contrast, *FARP1* shows specific  
1018 shape control and influences a range of features in proximal contexts only.

1019

## 1020 **Supplementary figure captions**

### 1021 **Supplementary Fig 1**

1022 Schematic of stage scanning oblique plane microscopy (ssOPM) imaging system.

1023

### 1024 **Supplementary Fig 2**

1025 Description of shape feature calculations. MATLAB's regionprops3 is from the image processing  
1026 toolbox.

1027

### 1028 **Supplementary Fig 3**

1029 Examples of accepted volumes for each treatment. The same example of accepted volume for  
1030 'Control' treatment is also shown in Fig 1D. CAAX signal (yellow) and DRAQ5 (magenta) are  
1031 shown.

1032

### 1033 **Supplementary Fig 4**

1034 **A.** Comparison of unsupervised segmentation methods. Feature values are shown for a threshold  
1035 based method and active contour method. Values were normalised to the median feature value  
1036 for the plate. The trends in values are similar in both segmentation methods. Features measured  
1037 using Otsu (blue) and active contour (orange) segmentation methods. **B.** Pair plots comparing  
1038 features between the original (uneroded) threshold mask (blue) and an eroded version (orange).

1039 The eroded mask is chosen to take into account the anisotropic ssOPM PSF. Features are  
1040 normalised to the median value for the plate.

1041

1042 **Supplementary Fig 5**

1043 **A.** Measurement of the effect of the spatially varying light sheet PSF on cell shape measurements.  
1044 The test plate uses shape measurements of the same cells in different axial positions with respect  
1045 to the light sheet. Collagen plate data is based on the axial location of cells in collagen, within the  
1046 field of view. Data points are normalised to the average cell at the bottom of the field of view  
1047 across the whole dataset. A viable feature measurement should have either a normalised value  
1048 close to one at all heights for the test plate, a change in the shape feature in collagen larger than  
1049 on the test plate or a change in shape feature in the opposite direction to the test plate. **B.**  
1050 Representative images of the test plate showing the same cells measured at different positions  
1051 within the light sheet.



# Fig 1

bioRxiv preprint doi: <https://doi.org/10.1101/2021.10.11.463377>; this version posted October 13, 2021. The copyright holder for this preprint (which was not certified by peer review) is the author/funder, who has granted bioRxiv a license to display the preprint in perpetuity. It is made available under aCC-BY 4.0 International license.

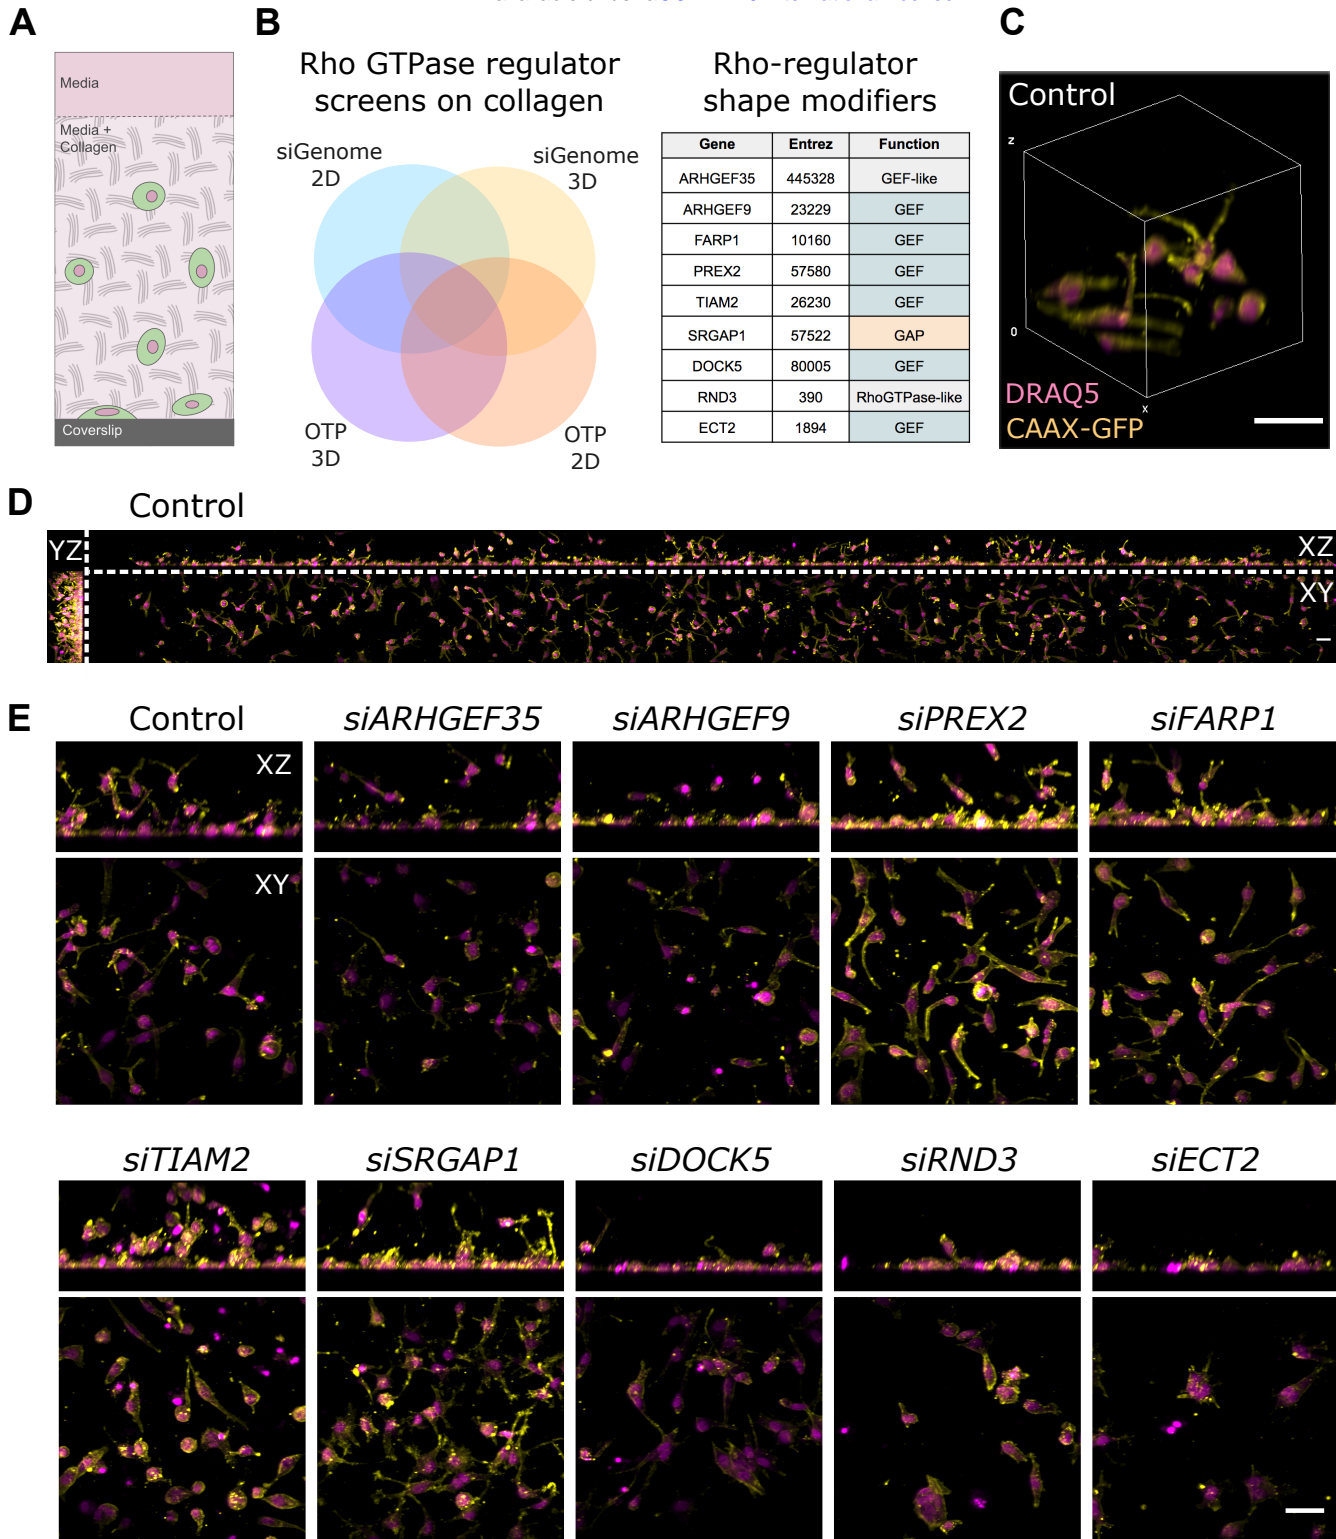

Fig 2

A

bioRxiv preprint doi: <https://doi.org/10.1101/2021.10.11.463377>; this version posted October 13, 2021. The copyright holder for this preprint (which was not certified by peer review) is the author/funder, who has granted bioRxiv a license to display the preprint in perpetuity. It is made available under aCC-BY 4.0 International license.

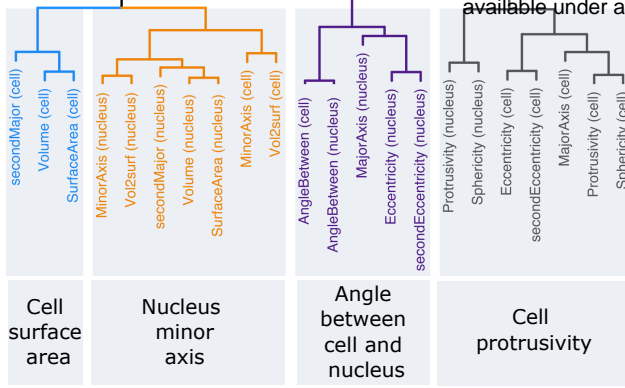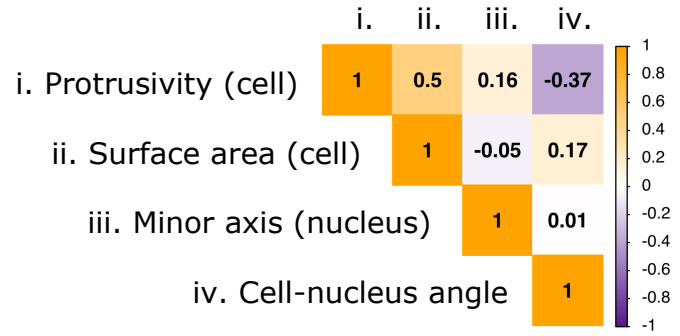

B

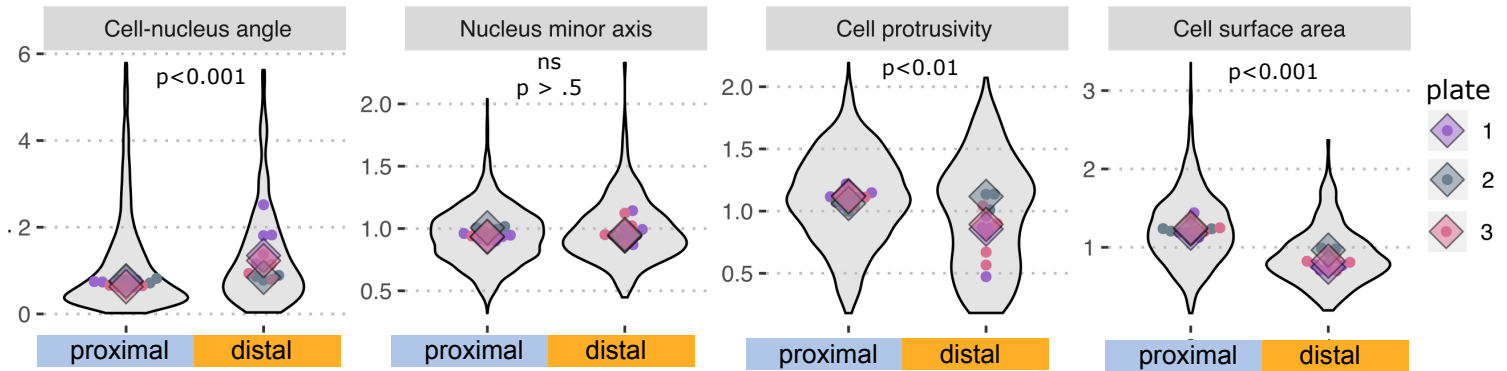

C

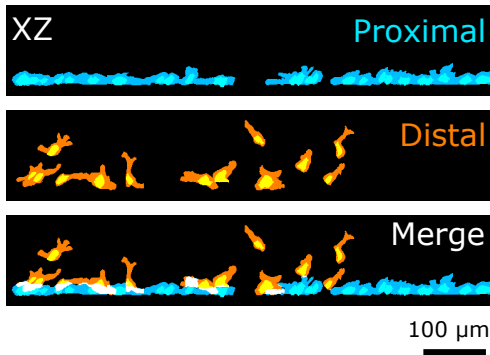

D

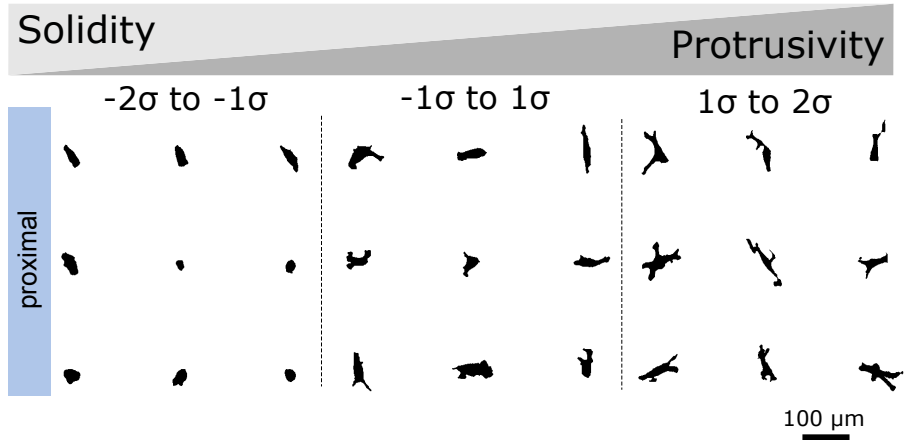

E

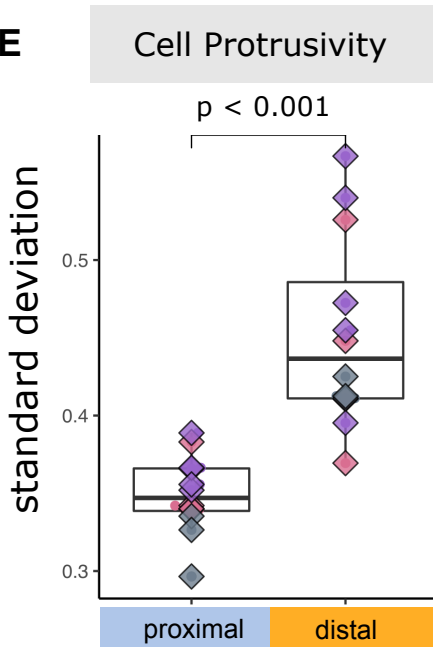

F

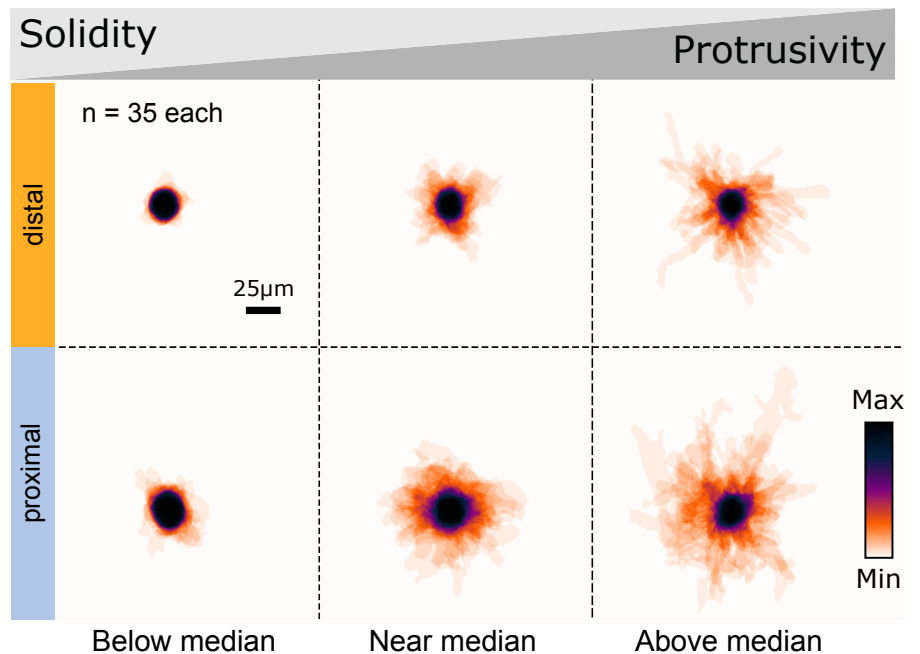

Fig 3

A bioRxiv preprint doi: <https://doi.org/10.1101/2021.10.11.463377>; this version posted October 13, 2021. The copyright holder for this preprint (which was not certified by peer review) is the author/funder, who has granted bioRxiv a license to display the preprint in perpetuity. It is made available under a [CC-BY 4.0 International license](https://creativecommons.org/licenses/by/4.0/).

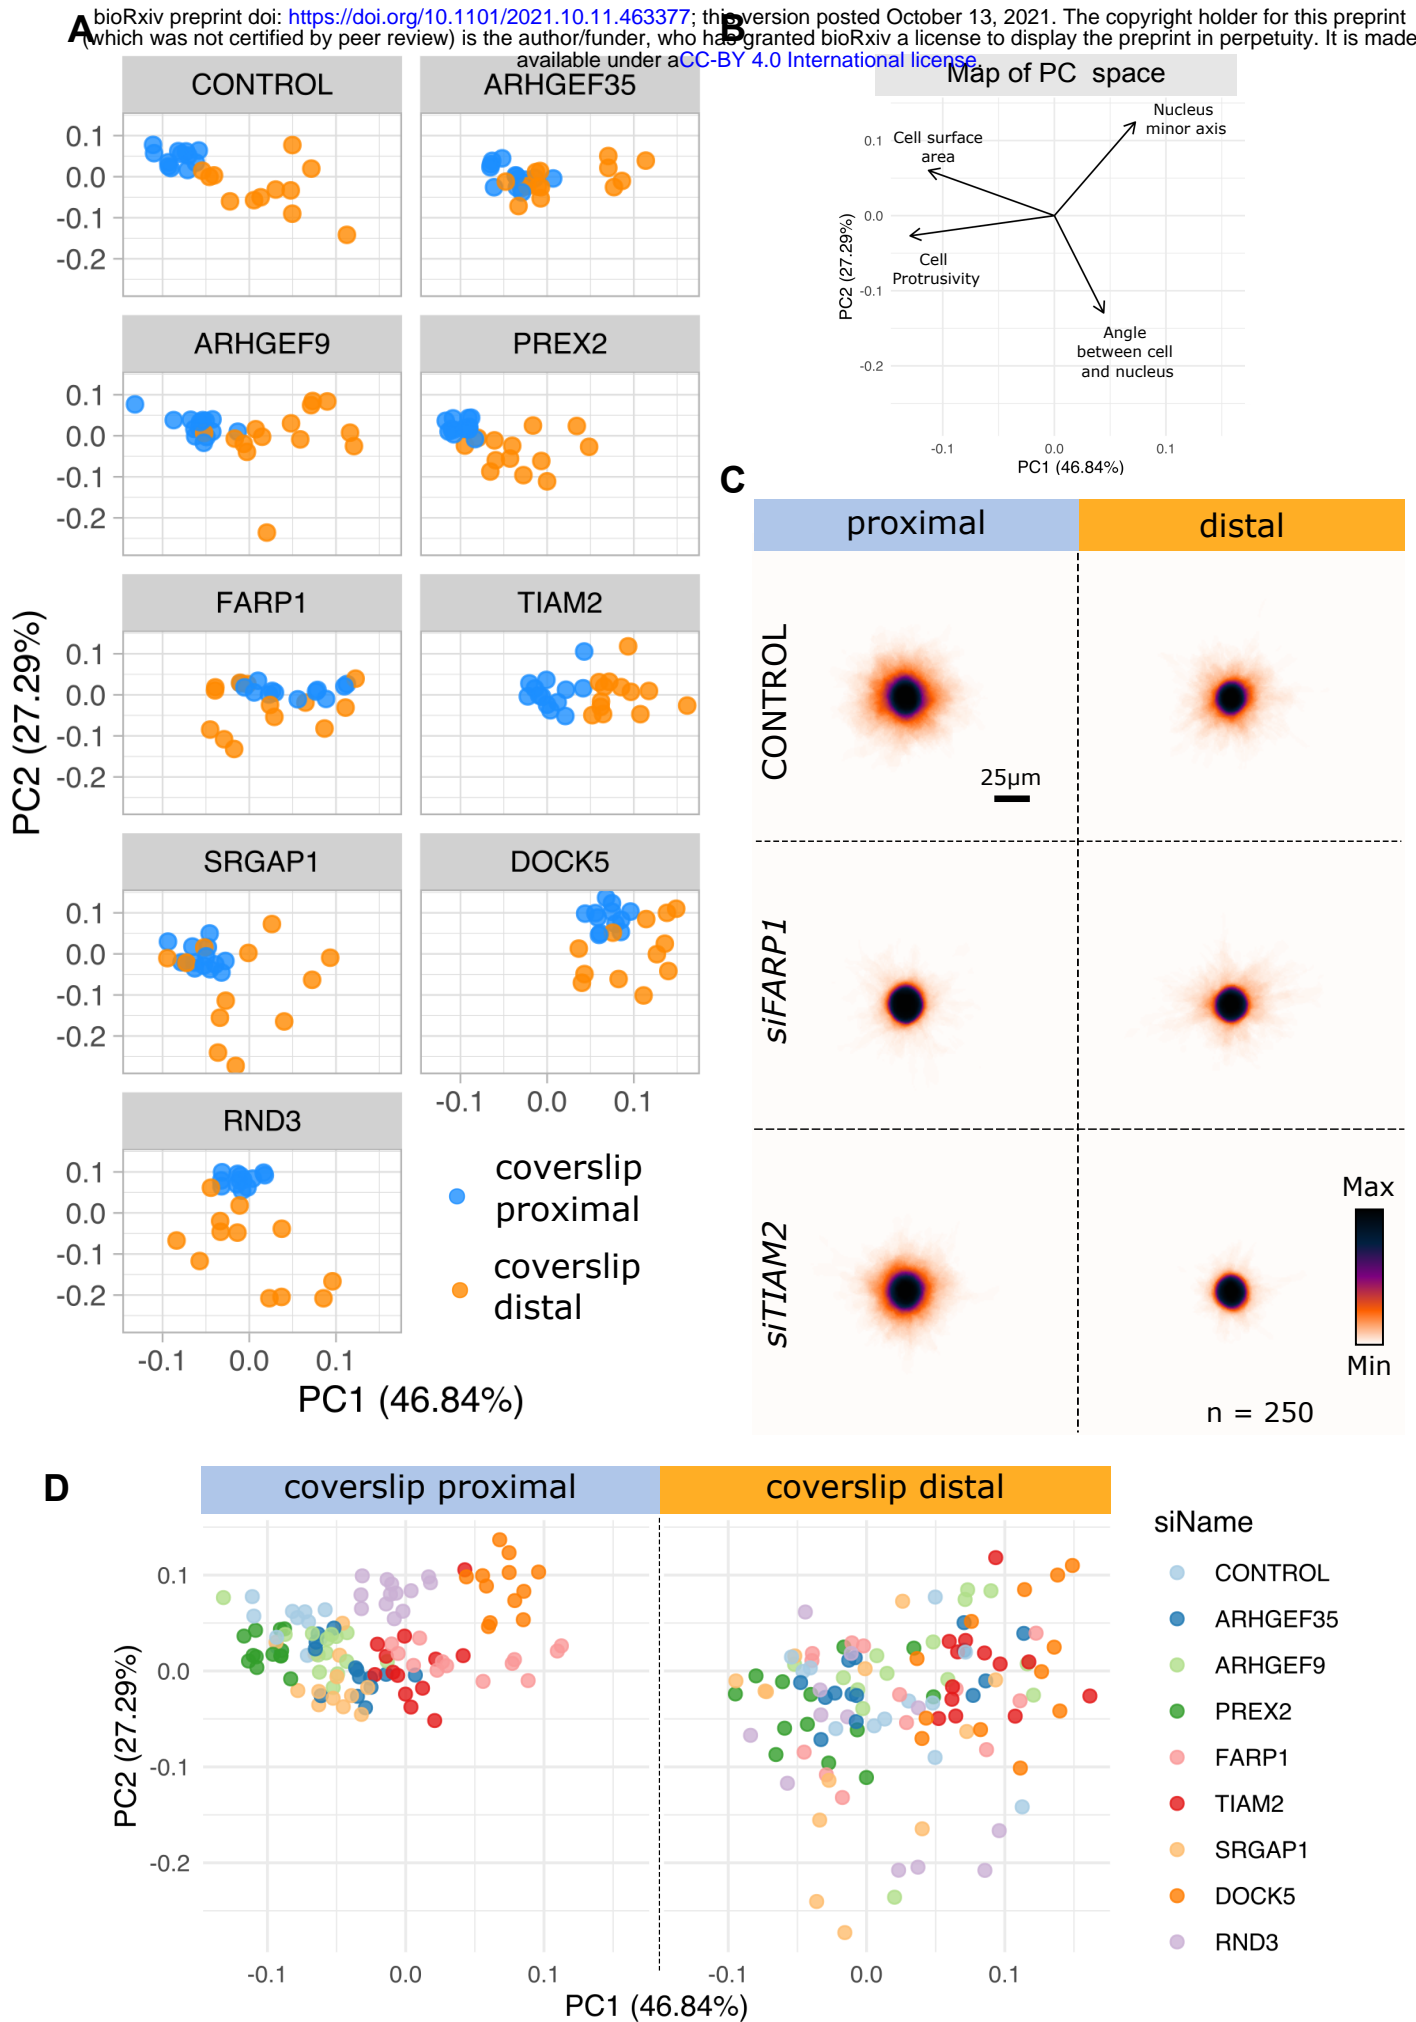

Fig 4

A

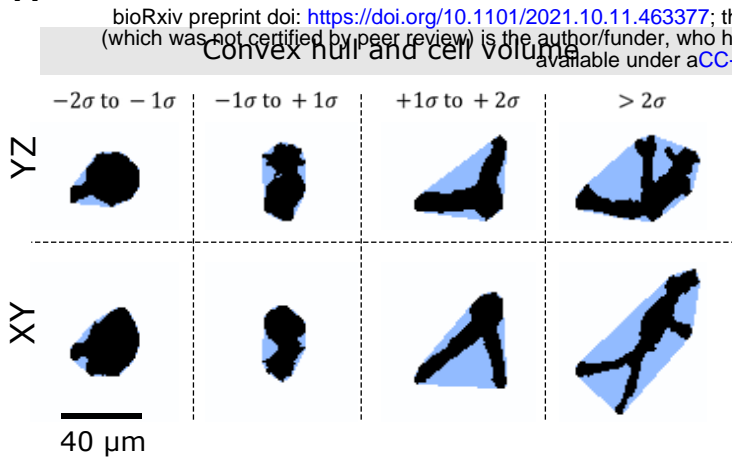

B

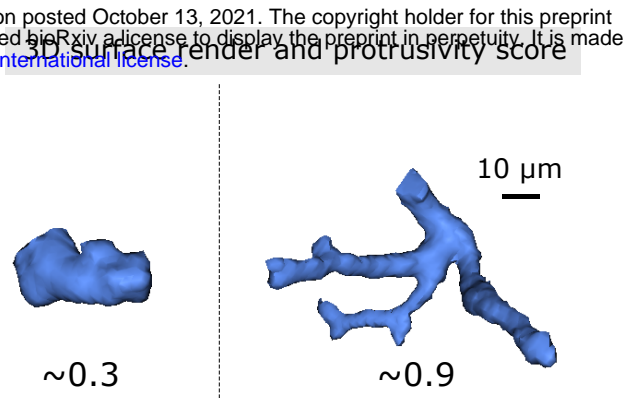

C

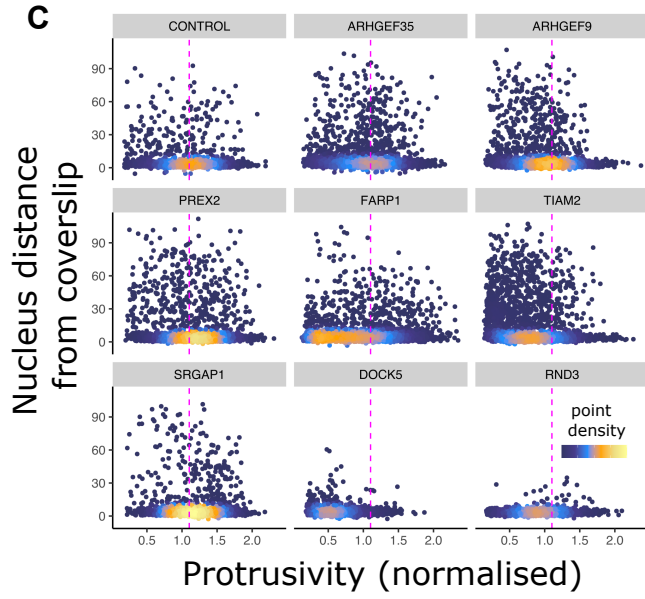

D

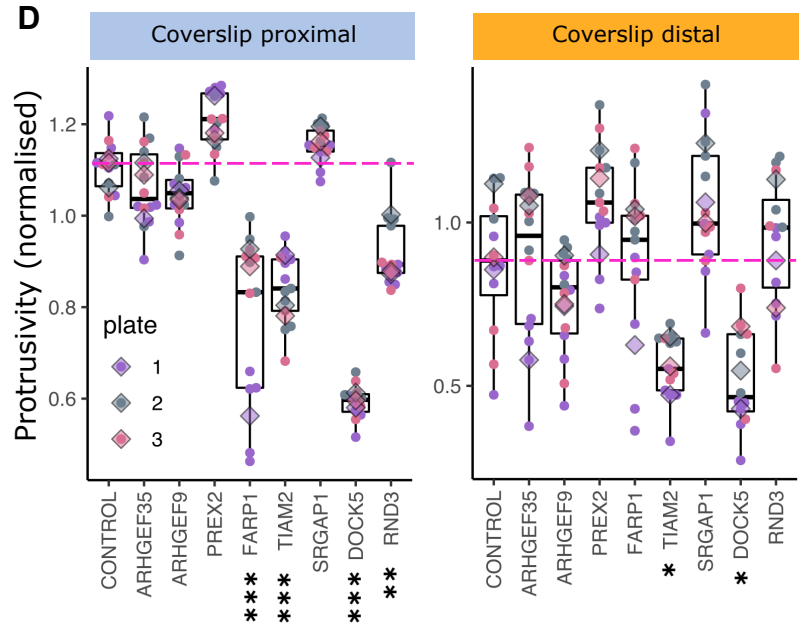

E

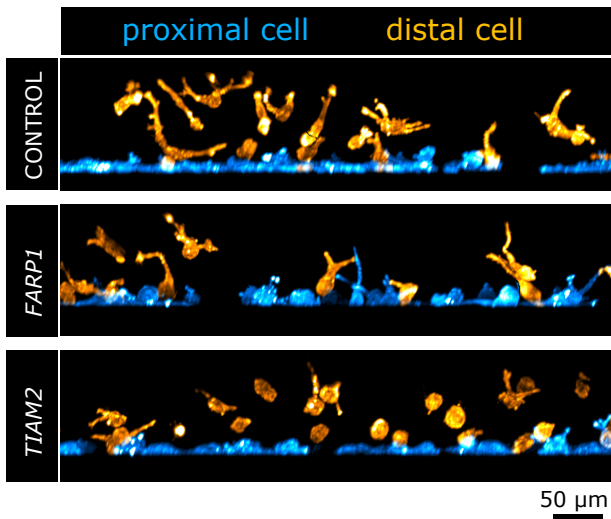

F

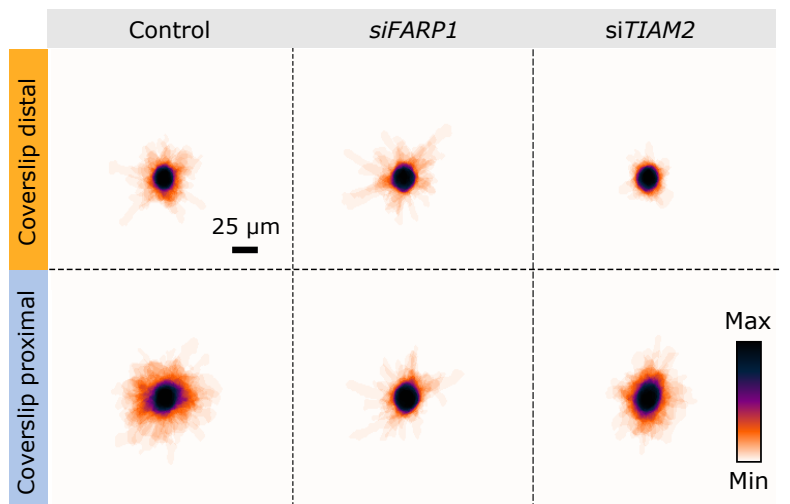

Fig 5

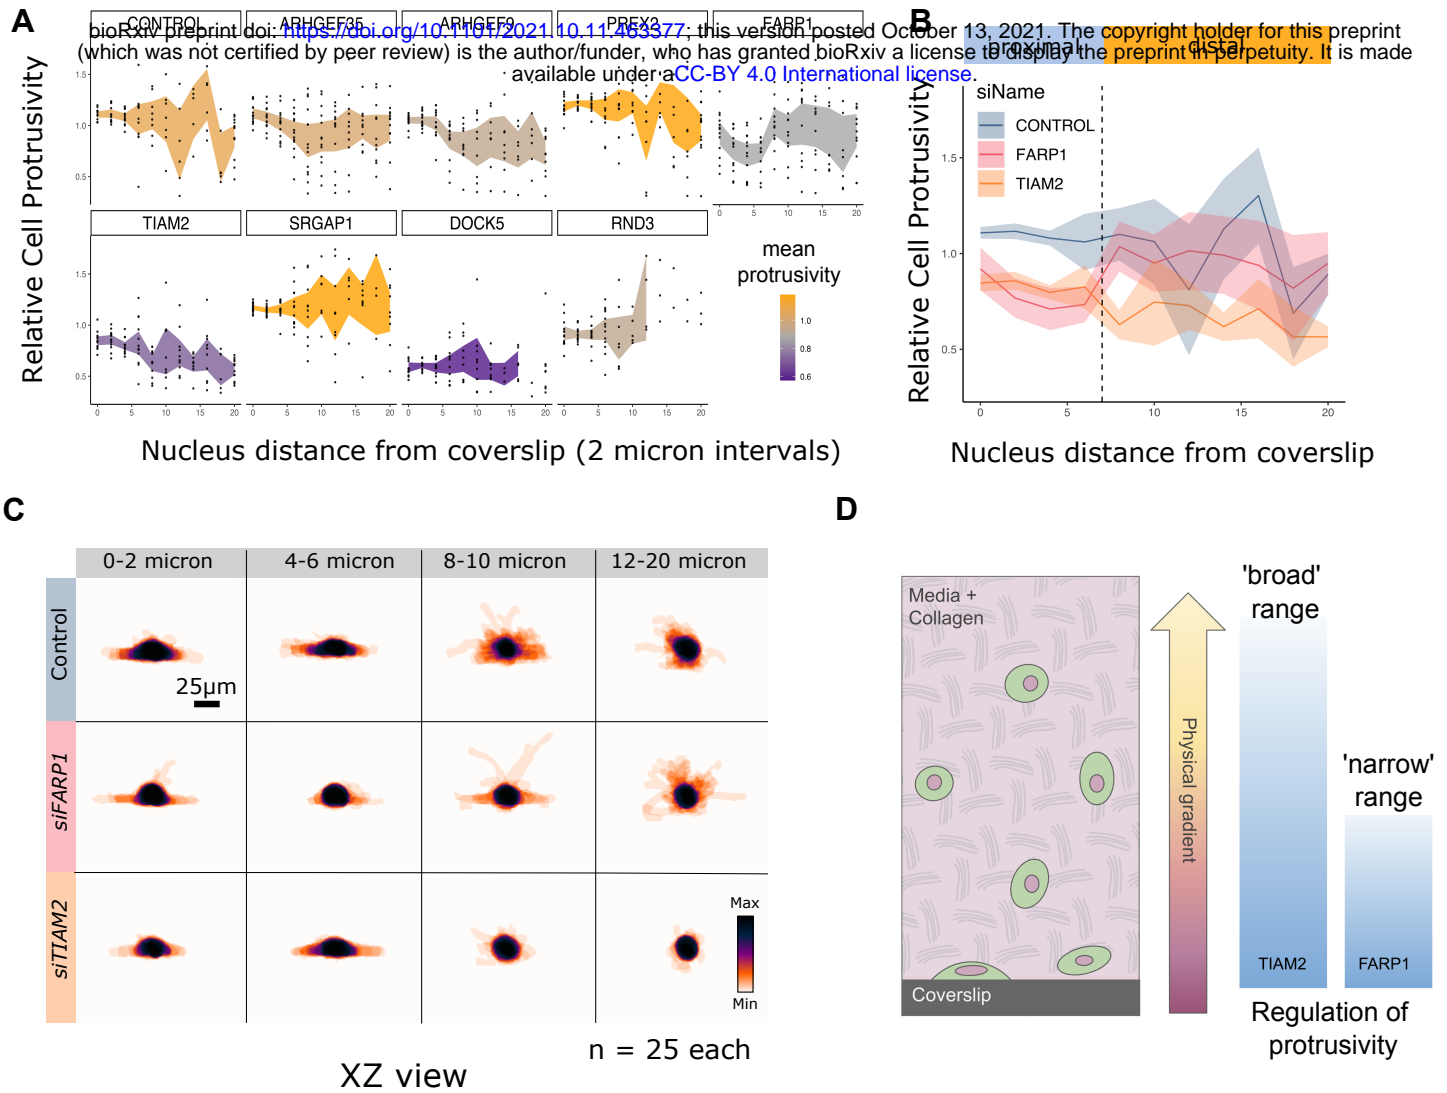

Fig 6

bioRxiv preprint doi: <https://doi.org/10.1101/2021.10.11.463377>; this version posted October 13, 2021. The copyright holder for this preprint (which was not certified by peer review) is the author/funder, who has granted bioRxiv a license to display the preprint in perpetuity. It is made available under aCC-BY 4.0 International license.

**A**

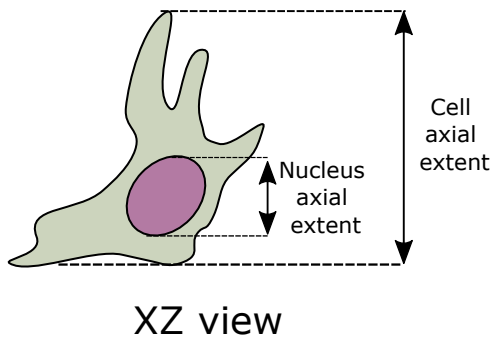

**B**

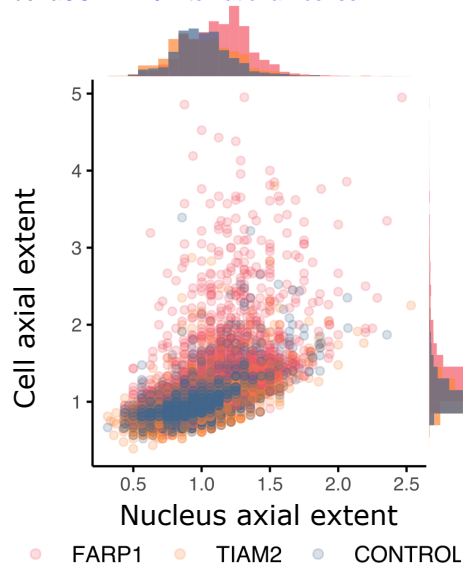

**C**

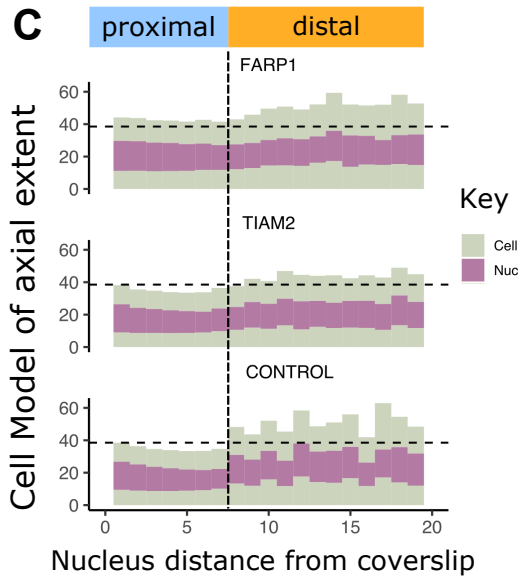

**D**

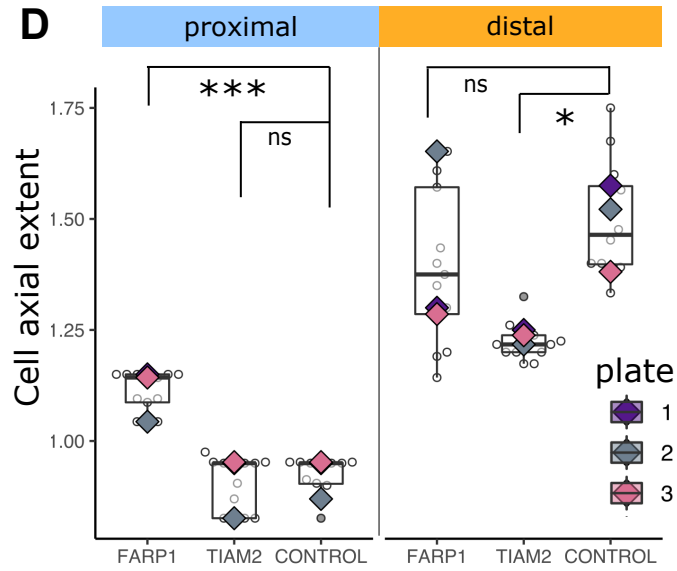

**E**

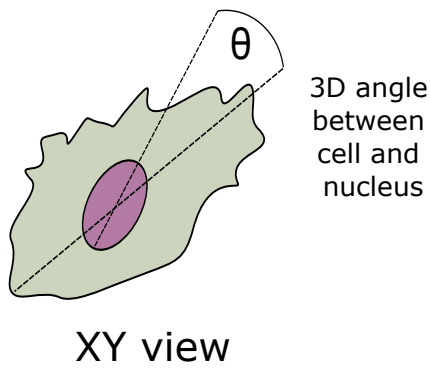

**F**

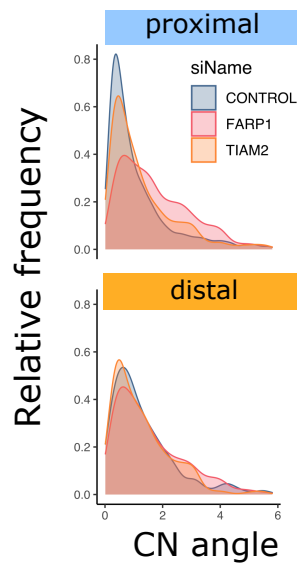

Fig 7

bioRxiv preprint doi: <https://doi.org/10.1101/2021.10.11.463377>; this version posted October 13, 2021. The copyright holder for this preprint (which was not certified by peer review) is the author/funder, who has granted bioRxiv a license to display the preprint in perpetuity. It is made available under a [CC-BY 4.0 International license](https://creativecommons.org/licenses/by/4.0/).

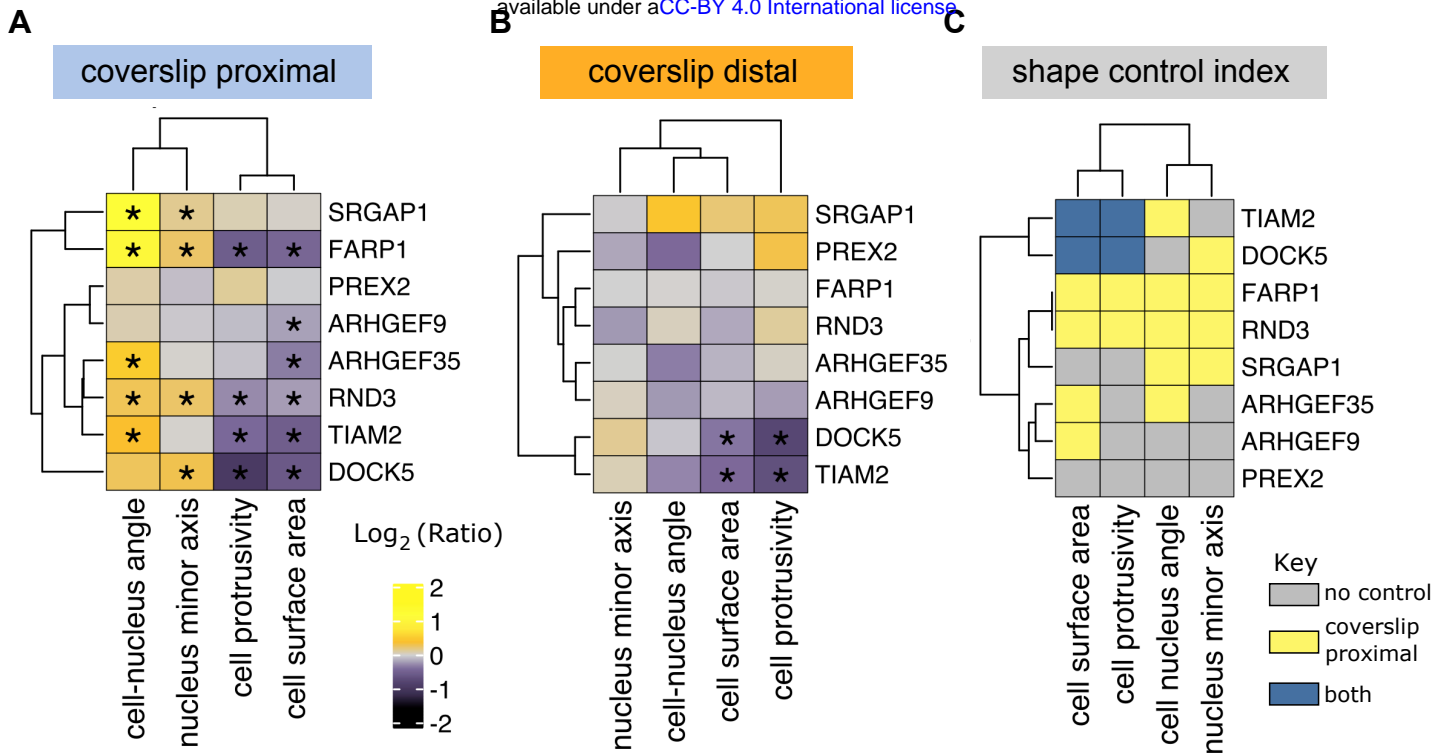

Source: https://biorxiv.org/content/10.1101/2021.10.11.463377v1.full.pdf
